# Supplementary material
Source: PubMed Central journal article supplement (PMC2879751)
Supplement: tpc.110.074153_1.pdf [file tpc.110.074153_1.pdf]

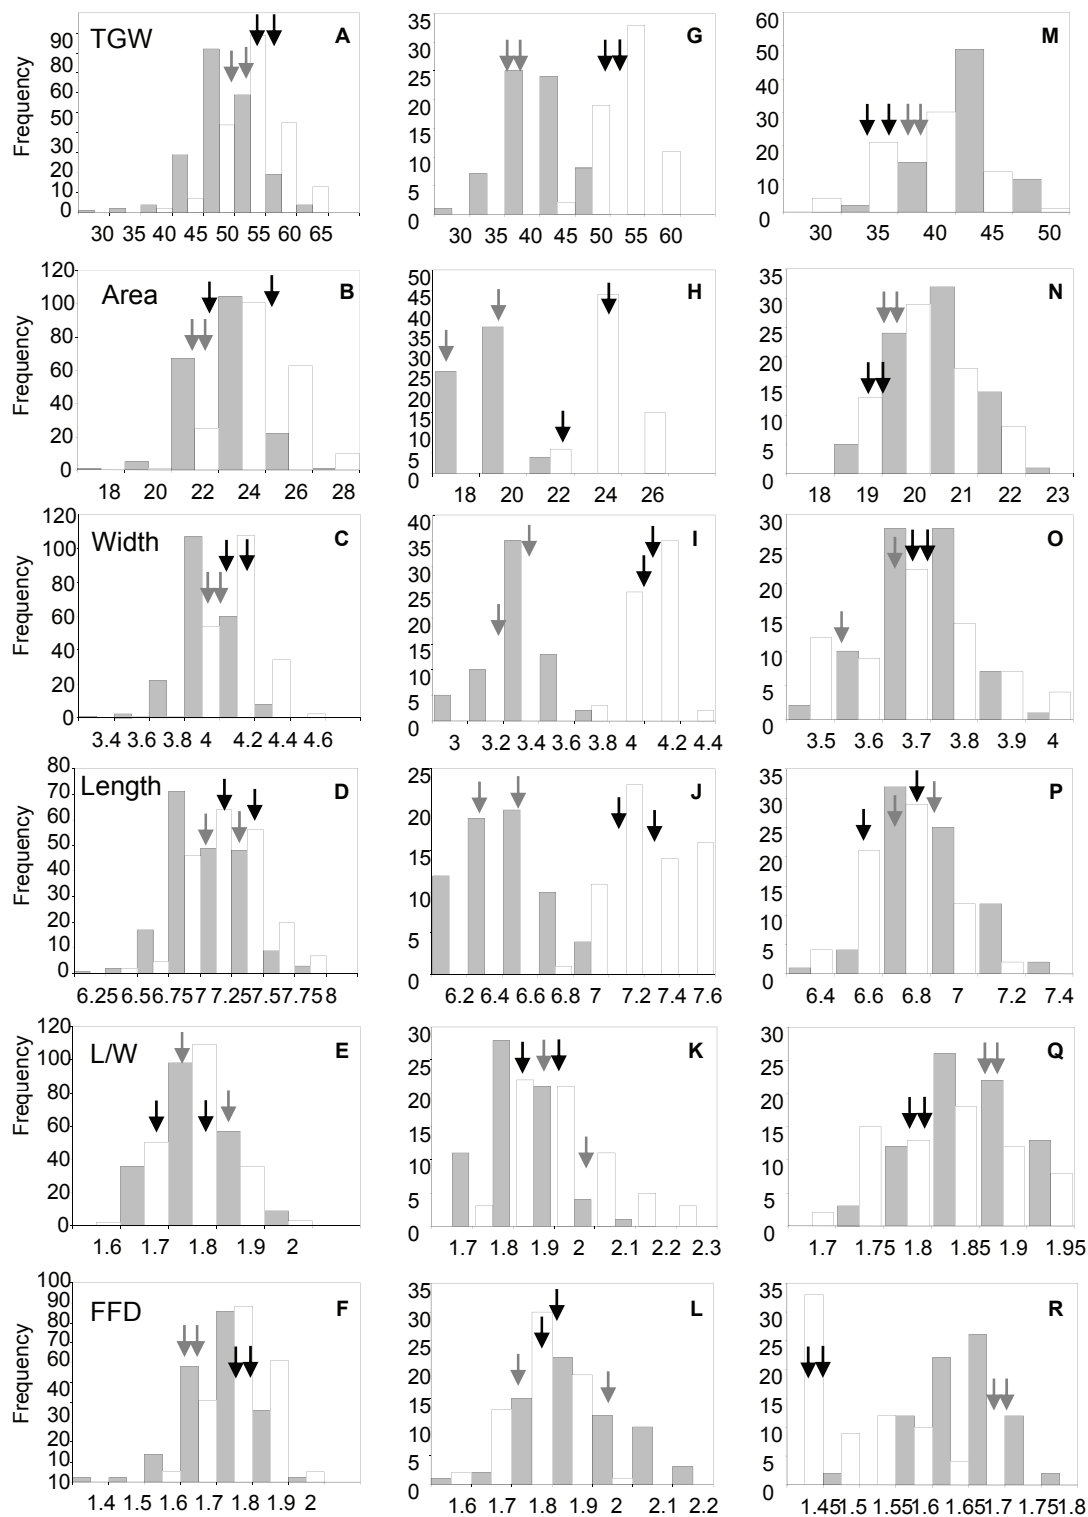

**Supplemental Figure 1.** Frequency distributions of the morphometric traits for AxC, BxS, and SxS. (A-F) Avalon x Candenza, (G-L) Beaver x Soissons, and (M-R) Shango x Shamrock. Mean parental values for each year are indicated by either a grey or black arrow for year 1 (grey bar) or 2 (white bar), respectively. Trait values (x-axis) are untransformed and expressed in g (TGW), mm (width, length) and mm<sup>2</sup> (area).

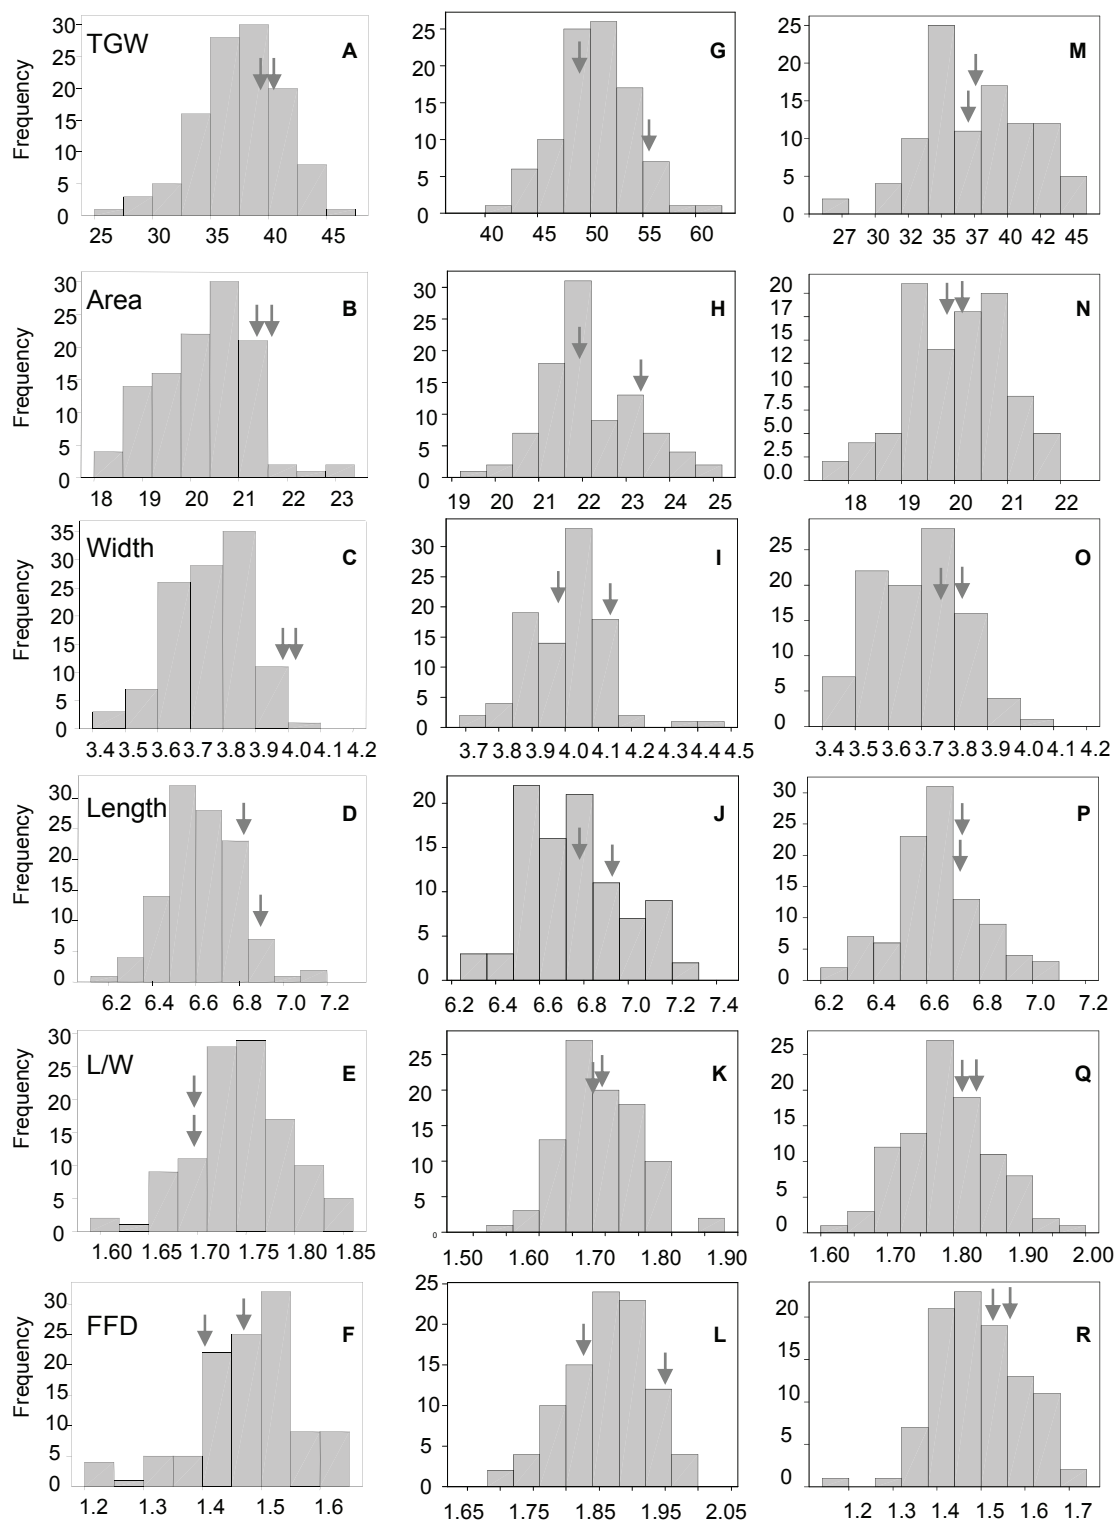

**Supplemental Figure 2.** Frequency distributions of the morphometric traits for Spark x Rialto, Savannah x Rialto, and Malacca x Charger. (A-F) Spark x Rialto, (G-L) Savannah x Rialto, and (M-R) Malacca x Charger. Mean parental values are indicated by a grey arrow. Trait values (x-axis) are untransformed and expressed in g (TGW), mm (width, length) and mm<sup>2</sup> (area).

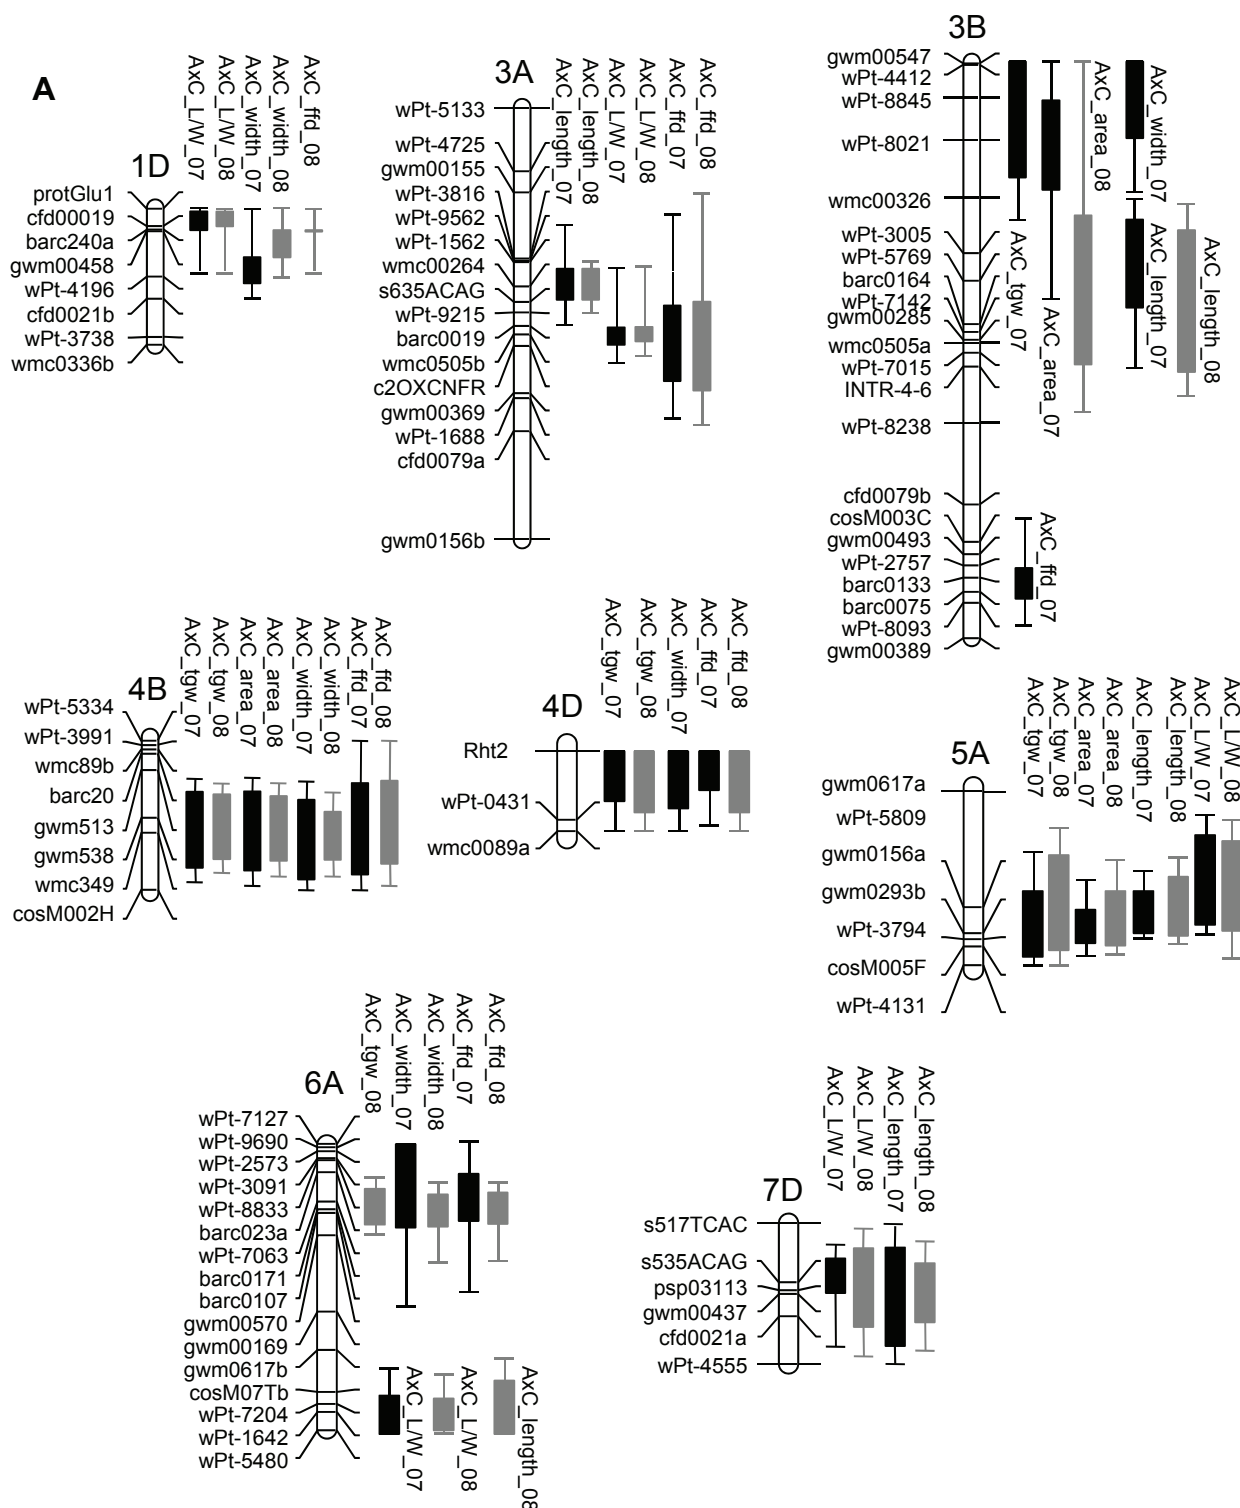

**Supplemental Figure 3.** QTL identified for the morphometric parameters in the six mapping populations. (A) AxC, (B) BxS, (C) SpXR, (D) SaxR, (E) MxC, and (F) SxS mapping populations. QTL are projected on the corresponding linkage maps with a solid bar and a closed line representing 1-LOD and 2-LOD mapping intervals, respectively. The numerical suffix at the end of the QTL name denotes the year of trial (i.e. 07 or 08).

Supplemental Figure 3 cont.

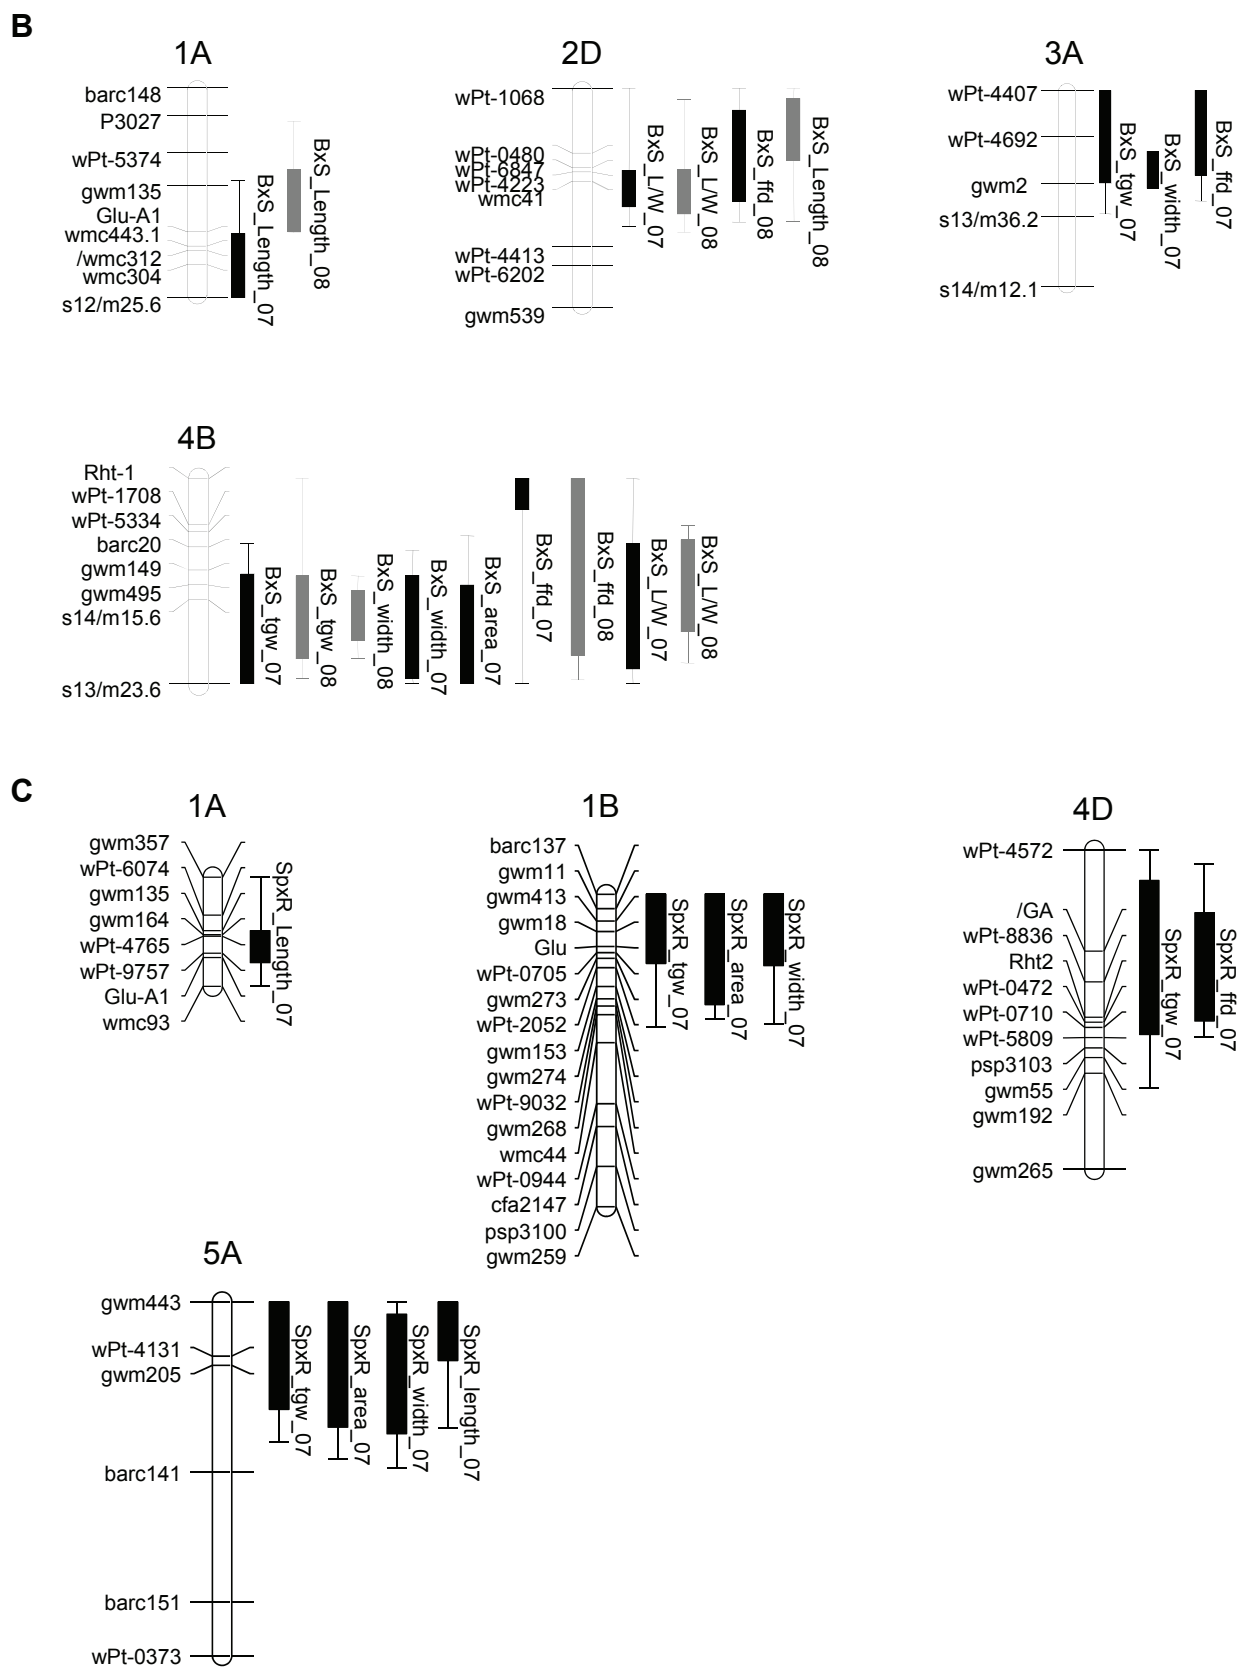

Supplemental Figure 3 cont.

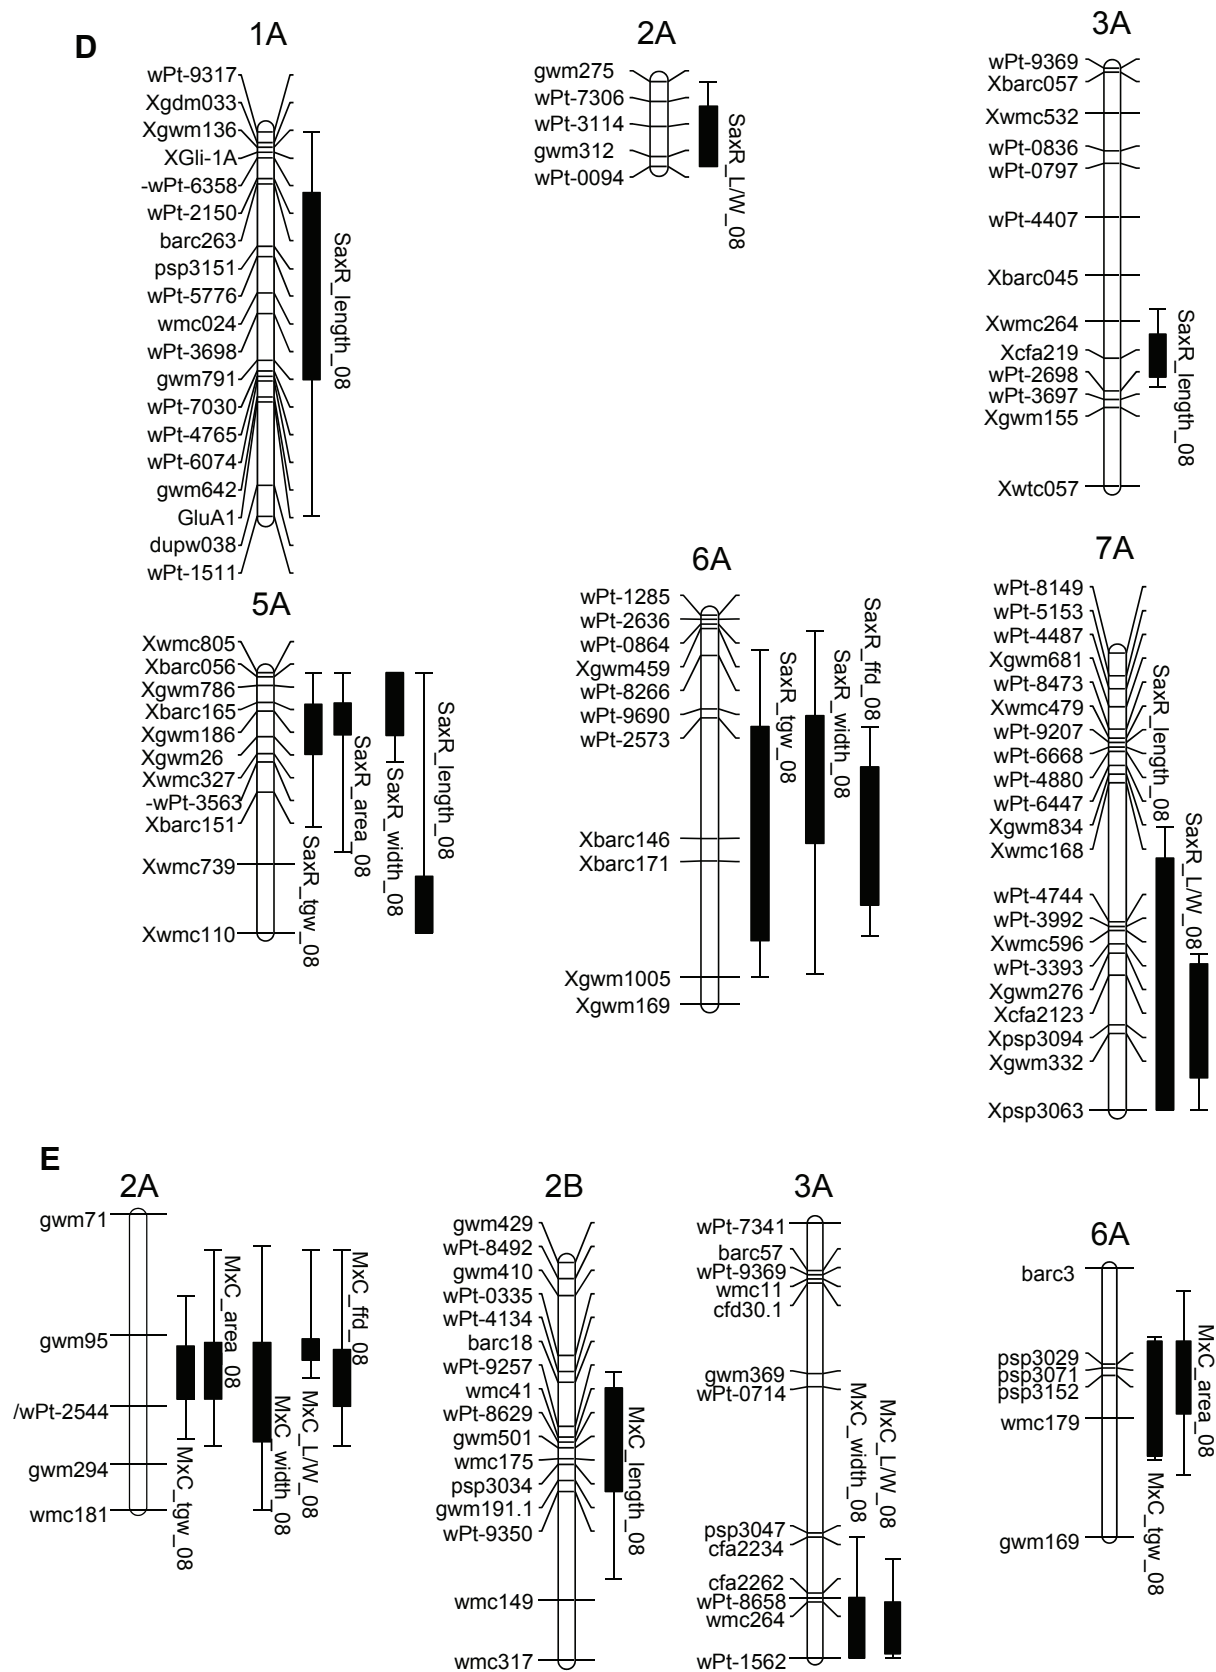

Supplemental Figure 3 cont.

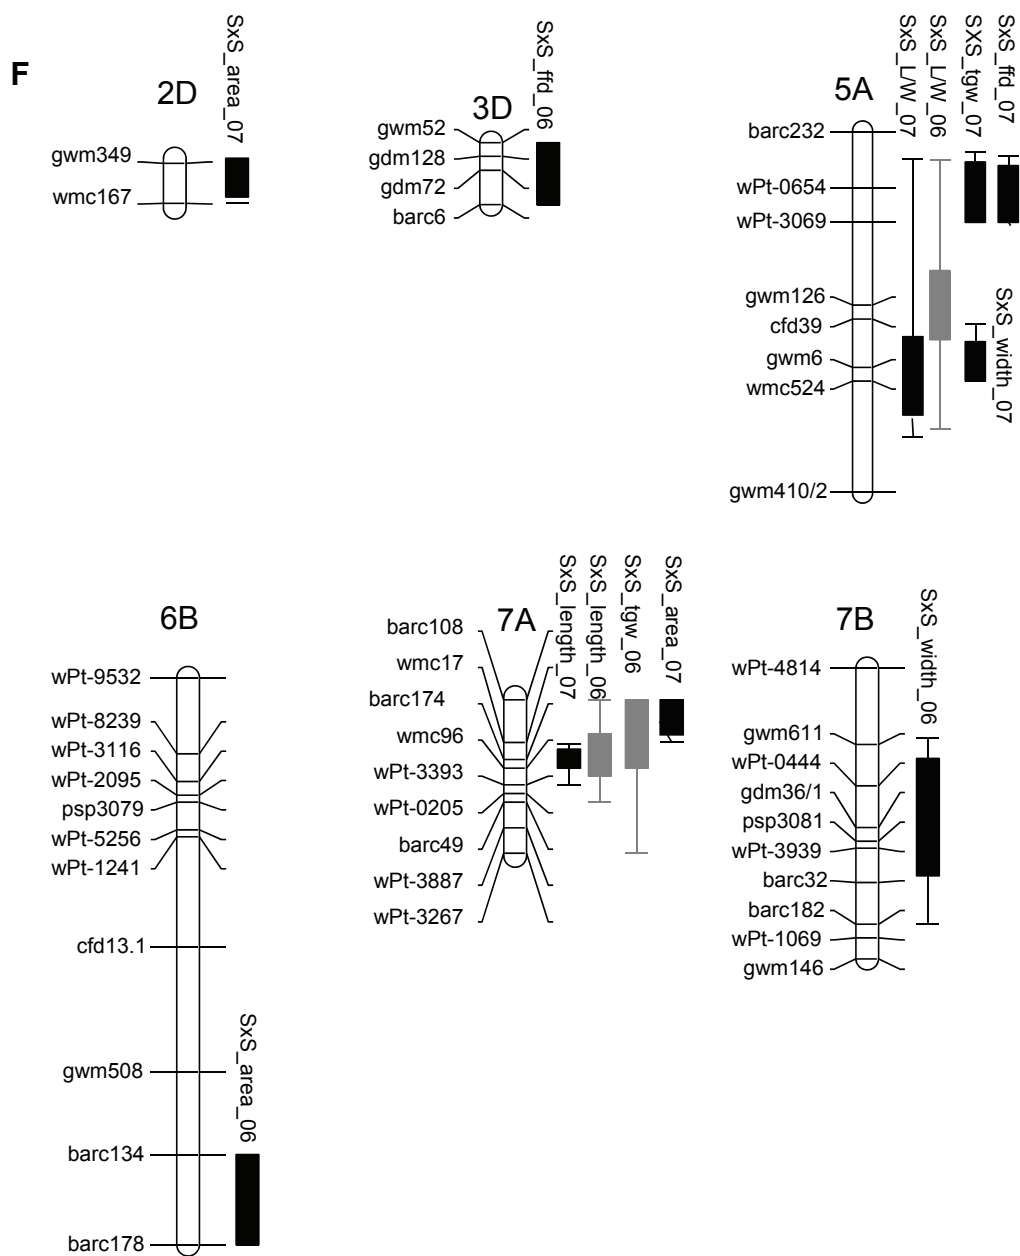



Supplemental Figure 4 cont.

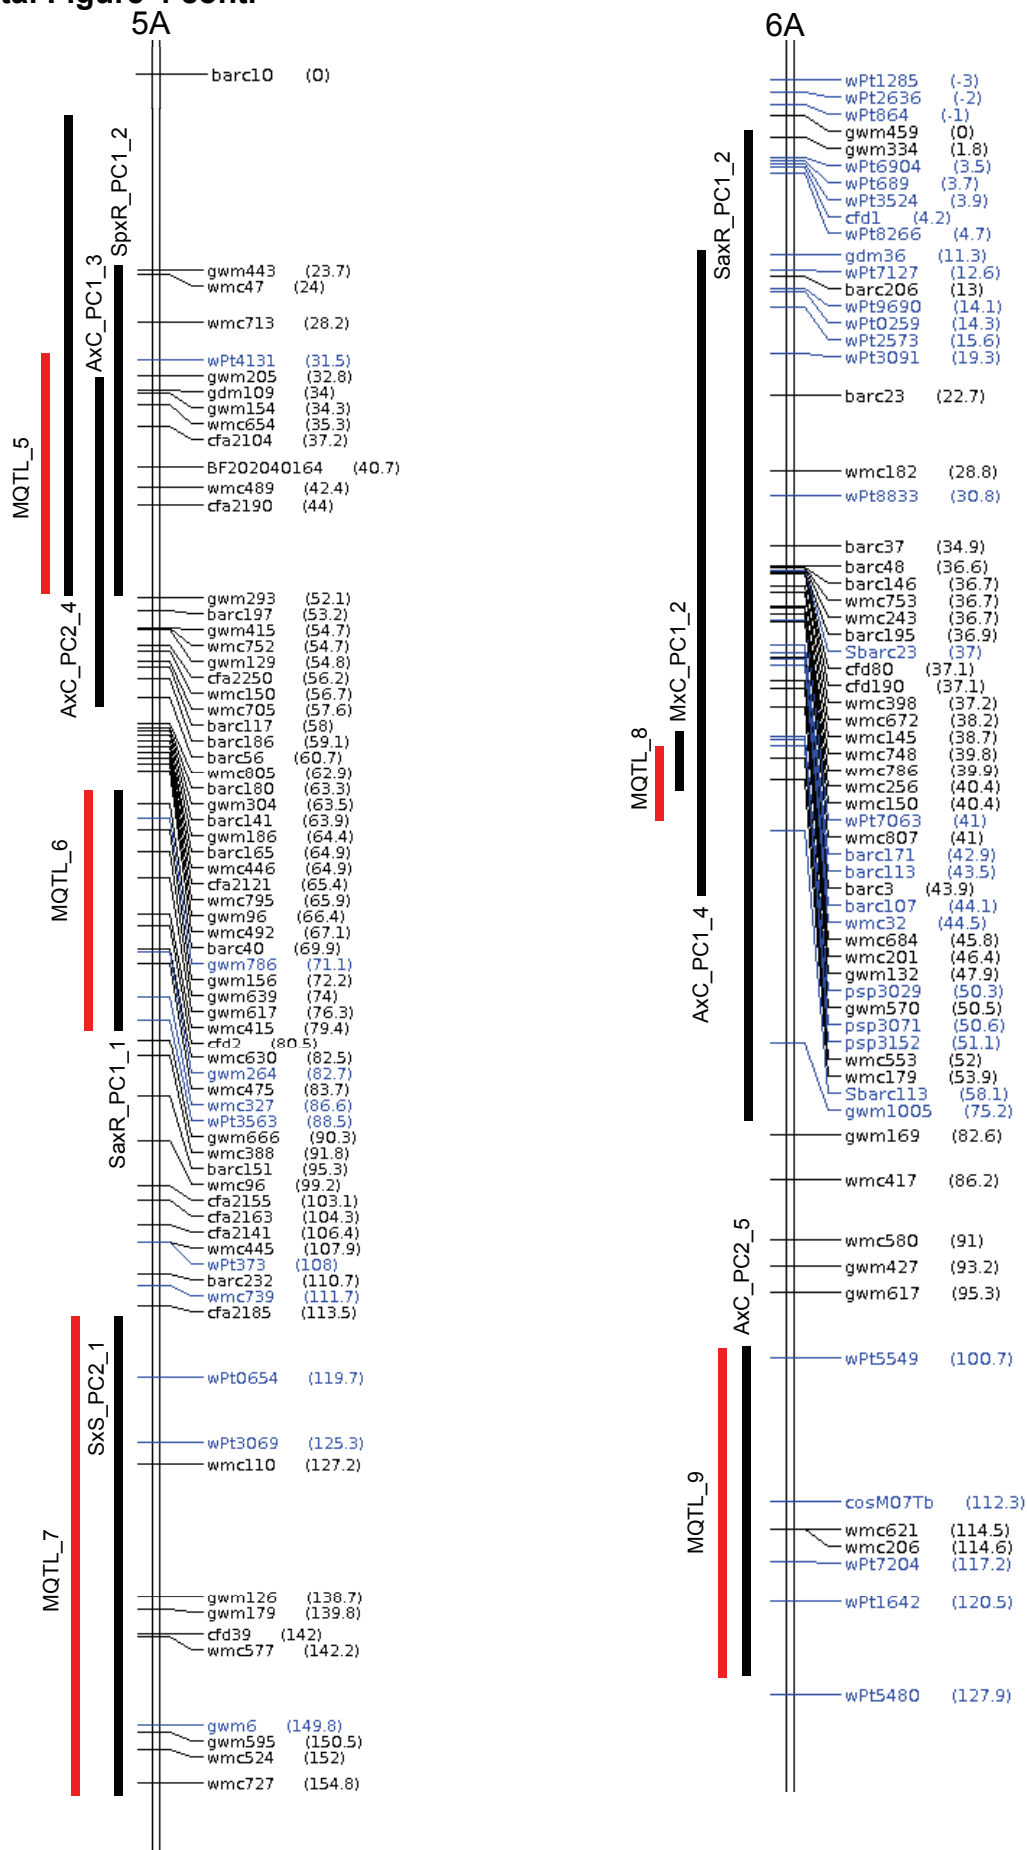



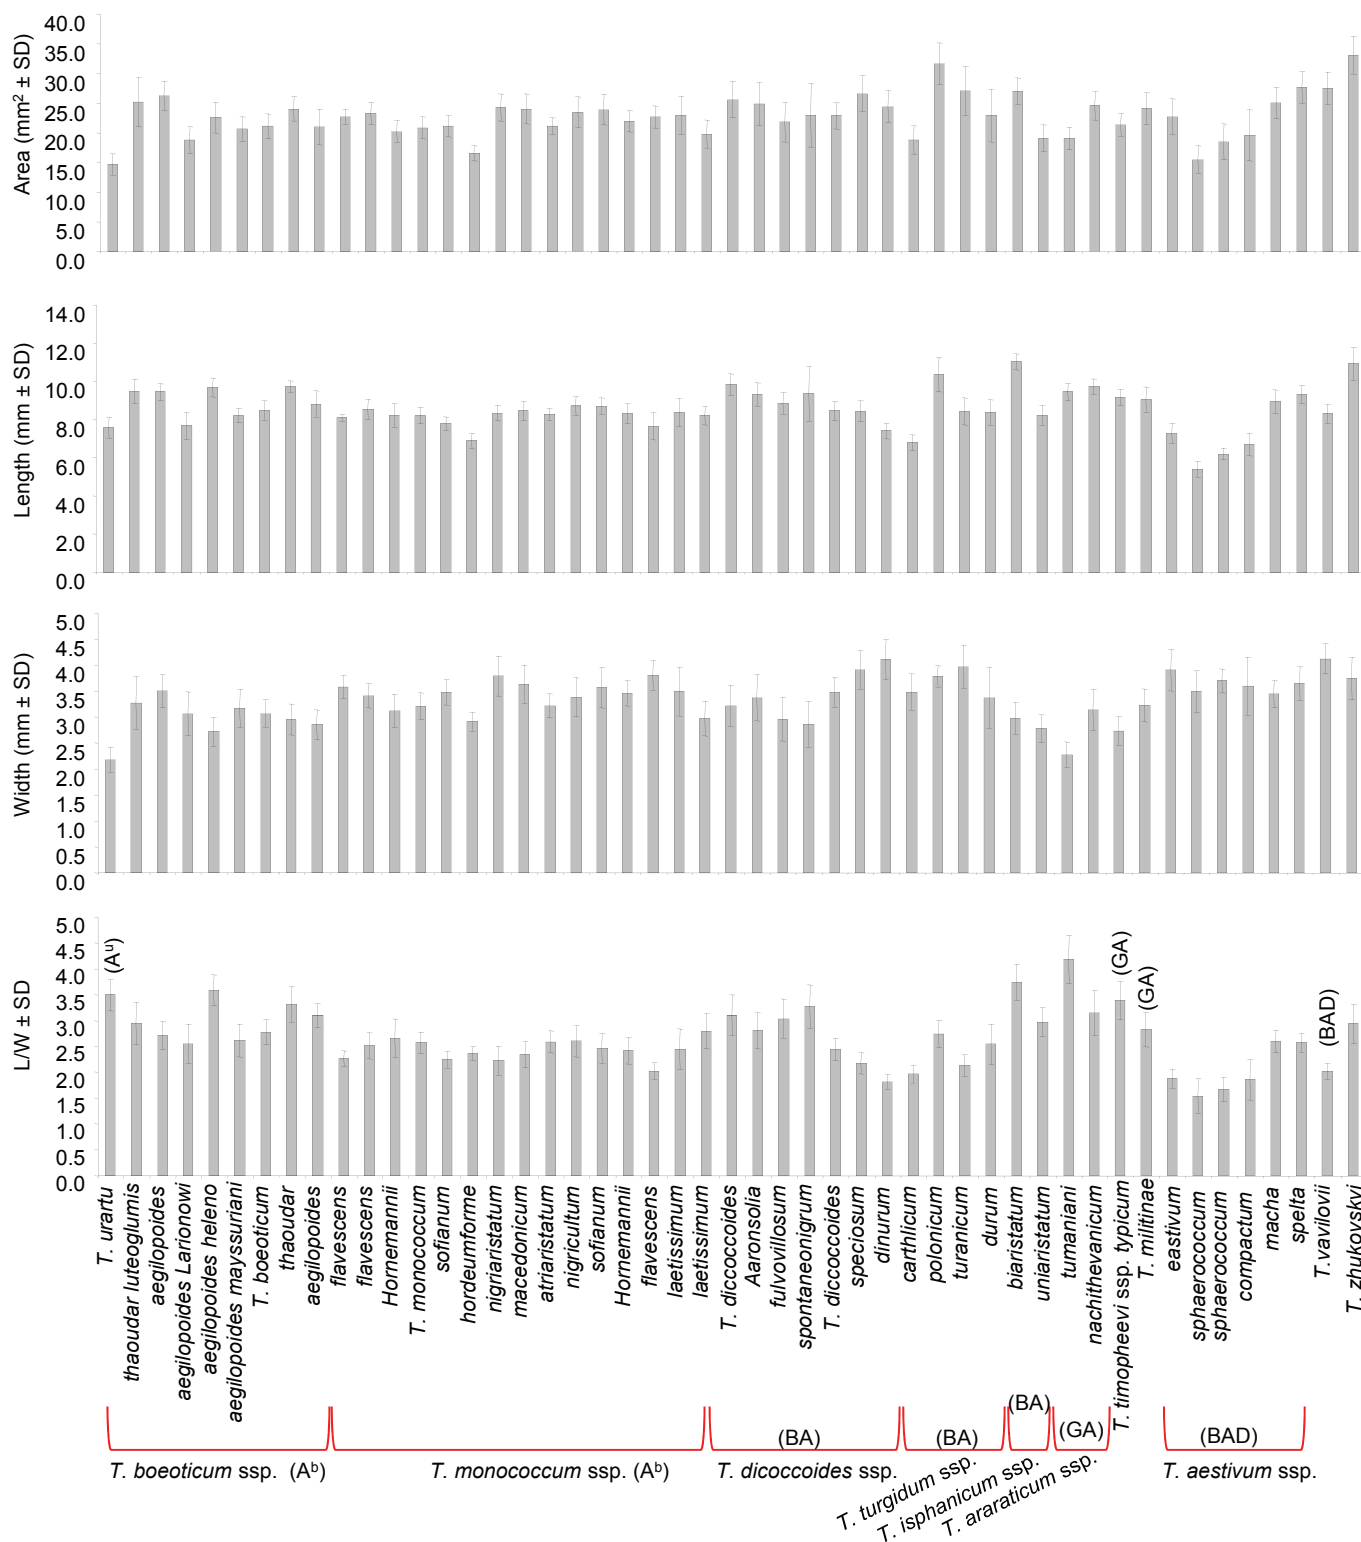

**Supplemental Figure 5.** Morphometric traits for *Triticum* species. Values represent the mean of 20-30 grains ± standard deviation (SD). The genome type of each species is given in parenthesis. The species taxonomy follows the classification appearing in the John Innes Centre Triticeae Collection (<http://data.jic.bbsrc.ac.uk/cgi-bin/germplasm/triticeae/>). Entries with the same species name represent different accession number (see Supplemental Table 7).

**Supplemental Table 1.** Trait variation and heritability in the parental lines and DH mapping populations. (A) AxC, (B) BxS, (C) SxS, (D) SpxR, (E) SaxR, (F) MxC. Values highlighted in bold are significant different at  $p < 0.001$ .

|                   | year 1                  |             |             |                 |                  |            | year 2        |                    |                   |               |           |                 |                |
|-------------------|-------------------------|-------------|-------------|-----------------|------------------|------------|---------------|--------------------|-------------------|---------------|-----------|-----------------|----------------|
|                   | mean $\pm$ SD           |             |             | mean $\pm$ SD   |                  |            | mean $\pm$ SD |                    |                   | mean $\pm$ SD |           |                 |                |
|                   | Beaver                  | Soisson     | DH (2007)   | range (min-max) | Beaver           | Soisson    | DH (2008)     | range (min-max)    | Beaver            | Soisson       | DH (2007) | range (min-max) | h <sup>2</sup> |
| <b>A</b>          |                         |             |             |                 |                  |            |               |                    |                   |               |           |                 |                |
| Beaver x Soisson  | TGW (g)                 | 40.4        | 40.9        | 40 $\pm$ 4.7    | 23 (26-49)       | 54.0       | 53.5          | 51.53 $\pm$ 3.81   | 21.6 (38.7-60.3)  | 0.83          |           |                 |                |
|                   | AREA (mm <sup>2</sup> ) | <b>19.6</b> | <b>17.7</b> | 18.3 $\pm$ 1.0  | 4.6 (16-20.6)    | <b>24</b>  | <b>22.6</b>   | 23.2 $\pm$ 1       | 4.9 (20.7-25.6)   | 0.84          |           |                 |                |
|                   | WIDTH (mm)              | 3.4         | 3.3         | 3.3 $\pm$ 0.18  | 1 (2.7-3.7)      | 4.1        | 4.1           | 4.05 $\pm$ 0.13    | 0.6 (3.7-4.3)     | 0.86          |           |                 |                |
|                   | LENGTH (mm)             | 6.6         | 6.3         | 6.43 $\pm$ 0.23 | 0.9 (6-6.9)      | 7.3        | 7.1           | 7.225 $\pm$ 0.23   | 1 (6.7-7.7)       | 0.93          |           |                 |                |
|                   | L/W                     | <b>2.0</b>  | <b>1.9</b>  | 1.95 $\pm$ 0.12 | 0.64 (1.7-2.4)   | <b>1.8</b> | <b>1.7</b>    | 1.786 $\pm$ 0.0822 | 0.4 (1.6-2)       | 0.92          |           |                 |                |
|                   | FFD                     | 1.8         | 2.0         | 1.9 $\pm$ 0.12  | 0.6 (1.5-2.1)    | 1.80       | 1.84          | 1.76 $\pm$ 0.089   | 0.6 (1.4-2)       | 0.78          |           |                 |                |
| <b>B</b>          |                         |             |             |                 |                  |            |               |                    |                   |               |           |                 |                |
| Shamrock x Shango | TGW                     | 41.6        | 42.7        | 43.2 $\pm$ 3.1  | 15.3 (34.0-49.3) | 34.52      | 35.9          | 36.3 $\pm$ 4.1     | 19 (26.3-45.3)    | 0.58          |           |                 |                |
|                   | AREA                    | 19.8        | 20.1        | 20.5 $\pm$ 0.86 | 4.2 (18.4-22.6)  | 19.3       | 19.8          | 19.9               | 3.8 (18.2-22.0)   | 0.61          |           |                 |                |
|                   | WIDTH                   | 3.6         | 3.7         | 3.7 $\pm$ 0.1   | 0.5 (3.5-4.0)    | 3.7        | 3.7           | 3.7 $\pm$ 0.14     | 0.5 (3.5-4.0)     | 0.63          |           |                 |                |
|                   | LENGTH                  | 6.8         | 6.9         | 6.9 $\pm$ 0.2   | 1.1 (6.3-7.4)    | 6.6        | 6.7           | 6.7 $\pm$ 0.17     | 0.7 (6.4-7.1)     | 0.82          |           |                 |                |
|                   | L/W                     | 1.9         | 1.9         | 1.8 $\pm$ 0.06  | 0.3 (1.7-2.0)    | 1.8        | 1.8           | 1.8 $\pm$ 0.07     | 0.3 (1.7-2)       | 0.85          |           |                 |                |
|                   | FFD                     | 1.7         | 1.7         | 1.7 $\pm$ 0.06  | 0.36 (1.47-1.83) | 1.41       | 1.45          | 1.5 $\pm$ 0.1      | 0.526 (1.12-1.65) | 0.52          |           |                 |                |
| <b>C</b>          |                         |             |             |                 |                  |            |               |                    |                   |               |           |                 |                |
| Avalon x Cadanza  | TGW                     | 48.8        | 48.8        | 52.7 $\pm$ 4.7  | 27.7 (37.8-65.5) | 54.4       | 52.3          | 49 $\pm$ 5.2       | 36.4 (28.6-65)    | 0.9           |           |                 |                |
|                   | AREA                    | 23.4        | 22.4        | 22.5 $\pm$ 1.4  | 9.8 (16.8-26.6)  | 24.8       | 23.1          | 23.6 $\pm$ 1.4     | 7.9 (18.9-26.8)   | 0.93          |           |                 |                |
|                   | WIDTH                   | 3.9         | 4.0         | 4.0 $\pm$ 0.2   | 1.1 (3.3-4.4)    | 4.1        | 4.2           | 4.1 $\pm$ 0.13     | 0.9 (3.6-4.5)     | 0.89          |           |                 |                |
|                   | LENGTH                  | <b>7.4</b>  | <b>7.0</b>  | 7.1 $\pm$ 0.3   | 1.6 (6.2-7.8)    | <b>7.5</b> | <b>7</b>      | 7.2 $\pm$ 0.3      | 1.5 (6.4-7.9)     | 0.95          |           |                 |                |
|                   | L/W                     | <b>1.9</b>  | <b>1.8</b>  | 1.8 $\pm$ 0.08  | 0.4 (1.6-2.0)    | <b>1.8</b> | <b>1.7</b>    | 1.7 $\pm$ 0.07     | 0.4 (1.6-2.0)     | 0.9           |           |                 |                |
|                   | FFD                     | 1.69        | 1.74        | 1.7 $\pm$ 0.09  | 0.6 (1.4-2.0)    | 1.77       | 1.78          | 1.8 $\pm$ 0.08     | 0.5 (1.5-2.0)     | 0.83          |           |                 |                |

## Supplemental Table 1 cont.

|                   | Spark       | Rialto      | DH (2007)    | range (min-max)  | h <sup>2</sup> |
|-------------------|-------------|-------------|--------------|------------------|----------------|
| <b>D</b>          |             |             |              |                  |                |
| TGW               | 40.3        | 40.0        | 37.6 ± 3.66  | 18.62 (27-45.6)  | 0.9            |
| AREA              | 21.9        | 21.8        | 20.3 ± 0.97  | 5.2 (18.1-23.3)  | 0.93           |
| WIDTH             | 4.1         | 4.0         | 3.8 ± 0.12   | 0.6 (3.5-4.1)    | 0.89           |
| LENGTH            | 7.0         | 6.8         | 6.6 ± 0.18   | 1 (6.2-7.2)      | 0.95           |
| L/W               | 1.7         | 1.7         | 1.7 ± 0.05   | 0.2 (1.6-1.8)    | 0.9            |
| FFD               | 1.4         | 1.5         | 1.5 ± 0.09   | 0.4 (1.2-1.6)    | 0.83           |
| Spark x Rialto    |             |             |              |                  |                |
| <b>E</b>          |             |             |              |                  |                |
|                   | Rialto      | Savannah    | DH (2008)    | range (min-max)  | h <sup>2</sup> |
| TGW               | <b>48.3</b> | <b>55.7</b> | 50.4 ± 3.60  | 19.4 (41.2-60.6) | 0.90           |
| Area              | 21.9        | 23.3        | 22.2 ± 1.05  | 5.5 (25-19.5)    | 0.90           |
| Width             | 4.0         | 4.1         | 4.0 ± 0.11   | 0.7 (3.8-4.4)    | 0.84           |
| Length            | 6.7         | 6.9         | 6.7 ± 0.21   | 1.0 (6.25-7.25)  | 0.86           |
| L/W               | 1.7         | 1.7         | 1.7 ± 0.06   | 0.3 (1.6-1.9)    | 0.85           |
| FFD               | <b>1.8</b>  | <b>2.0</b>  | 1.9 ± 0.06   | 0.3 (1.7-2.0)    | 0.78           |
| Savannah x Rialto |             |             |              |                  |                |
| <b>F</b>          |             |             |              |                  |                |
|                   | Malacca     | Charger     | DH (2007)    | range (min-max)  | h <sup>2</sup> |
| TGW               | 37.8        | 37.0        | 37.49 ± 3.98 | 17.8 (26.8-44.5) | 0.64           |
| Area              | 20.4        | 20.2        | 20 ± 0.91    | 4.3 (17.6-21.9)  | 0.52           |
| Width             | 3.8         | 3.7         | 3.7 ± 0.14   | 0.7 (3.4-4.1)    | 0.60           |
| Length            | 6.7         | 6.7         | 6.7 ± 0.17   | 0.8 (6.3-7.1)    | 0.73           |
| L/W               | 1.8         | 1.8         | 1.8 ± 0.07   | 0.3 (1.6-1.9)    | 0.67           |
| FFD               | 1.5         | 1.5         | 1.5 ± 0.1    | 0.5 (1.2-1.7)    | 0.51           |
| Malacca x Charger |             |             |              |                  |                |

**Supplemental Table 2.** Spearman rank correlation coefficients between morphometric traits. (A) Avalon x Candenza, (B) Beaver x Soissons, (C) Shango x Shamrock, (D) Spark x Rialto, (E) Malacca x Charger and (F) Savannah x Rialto. Values in bold represent non-significant correlations, (\*) denotes  $p < 0.05$ , all the other correlations are significant at  $p < 0.01$ .

| <b>A (AxC)</b> | TGW           |               | Area   |        | Width  |        | Length       |              | L/W    |        | FFD    |        |
|----------------|---------------|---------------|--------|--------|--------|--------|--------------|--------------|--------|--------|--------|--------|
|                | year 1        | year 2        | year 1 | year 2 | year 1 | year 2 | year 1       | year 2       | year 1 | year 2 | year 1 | year 2 |
| TGW            |               |               |        |        |        |        |              |              |        |        |        |        |
| Area           | 0.883         | 0.895         |        |        |        |        |              |              |        |        |        |        |
| Width          | 0.902         | 0.873         | 0.754  | 0.743  |        |        |              |              |        |        |        |        |
| Length         | 0.547         | 0.622         | 0.829  | 0.862  | 0.319  | 0.376  |              |              |        |        |        |        |
| L/W            | <b>-0.171</b> | <b>-0.043</b> | 0.175  | 0.271  | -0.457 | -0.379 | 0.644        | 0.675        |        |        |        |        |
| FFD            | 0.848         | 0.789         | 0.537  | 0.477  | 0.781  | 0.684  | <b>0.119</b> | <b>0.117</b> | -0.478 | -0.405 |        |        |

| <b>B (BxS)</b> | TGW           |                | Area          |              | Width         |               | Length       |               | L/W           |        | FFD    |        |
|----------------|---------------|----------------|---------------|--------------|---------------|---------------|--------------|---------------|---------------|--------|--------|--------|
|                | year 1        | year 2         | year 1        | year 2       | year 1        | year 2        | year 1       | year 2        | year 1        | year 2 | year 1 | year 2 |
| TGW            |               |                |               |              |               |               |              |               |               |        |        |        |
| Area           | 0.768         | 0.778          |               |              |               |               |              |               |               |        |        |        |
| Width          | 0.856         | 0.807          | 0.705         | 0.566        |               |               |              |               |               |        |        |        |
| Length         | <b>0.194</b>  | 0.277*         | 0.645         | 0.716        | <b>0.006</b>  | <b>-0.084</b> |              |               |               |        |        |        |
| L/W            | <b>-0.132</b> | <b>-0.284*</b> | <b>-0.078</b> | <b>0.187</b> | <b>-0.156</b> | -0.654        | <b>0.058</b> | 0.774         |               |        |        |        |
| FFD            | 0.868         | 0.821          | 0.4           | 0.35         | 0.681         | 0.64          | <b>-0.2</b>  | <b>-0.155</b> | <b>-0.103</b> | -0.523 |        |        |

| <b>C (SxS)</b> | TGW           |        | Area         |         | Width  |        | Length       |        | L/W    |        | FFD    |        |
|----------------|---------------|--------|--------------|---------|--------|--------|--------------|--------|--------|--------|--------|--------|
|                | year 1        | year 2 | year 1       | year 2  | year 1 | year 2 | year 1       | year 2 | year 1 | year 2 | year 1 | year 2 |
| TGW            |               |        |              |         |        |        |              |        |        |        |        |        |
| Area           | 0.907         | 0.904  |              |         |        |        |              |        |        |        |        |        |
| width          | 0.871         | 0.887  | 0.737        | 0.814   |        |        |              |        |        |        |        |        |
| Length         | 0.583         | 0.487  | 0.811        | 0.731   | 0.297* | 0.294* |              |        |        |        |        |        |
| L/W            | <b>-0.171</b> | -0.522 | <b>0.127</b> | -0.299* | -0.521 | -0.756 | 0.626        | 0.359  |        |        |        |        |
| FFD            | 0.833         | 0.928  | 0.581        | 0.724   | 0.754  | 0.767  | <b>0.177</b> | 0.249* | -0.455 | -0.576 |        |        |

| <b>D (SpxR)</b> | TGW            | Area          | Width  | Length | L/W     | FFD | <b>E (MxC)</b> | TGW    | Area   | Width  | Length | L/W    | FFD |
|-----------------|----------------|---------------|--------|--------|---------|-----|----------------|--------|--------|--------|--------|--------|-----|
|                 | TGW            | 1             |        |        |         |     |                |        | TGW    | 1      |        |        |     |
| Area            | 0.886          | 1             |        |        |         |     | Area           | 0.904  | 1      |        |        |        |     |
| Width           | 0.849          | 0.842         | 1      |        |         |     | Width          | 0.868  | 0.85   | 1      |        |        |     |
| Length          | 0.682          | 0.855         | 0.531  | 1      |         |     | Length         | 0.548  | 0.745  | 0.379* | 1      |        |     |
| L/W             | <b>-0.288*</b> | <b>-0.137</b> | -0.574 | 0.331* | 1       |     | L/W            | -0.476 | -0.336 | -0.748 | 0.271* | 1      |     |
| FFD             | 0.875          | 0.589         | 0.607  | 0.354* | -0.336* | 1   | FFD            | 0.931  | 0.72   | 0.718  | 0.337* | -0.455 | 1   |

| <b>F (SaxR)</b> | TGW           | Area         | Width  | Length | L/W           | FFD |
|-----------------|---------------|--------------|--------|--------|---------------|-----|
|                 | TGW           | 1            |        |        |               |     |
| Area            | 0.908         | 1            |        |        |               |     |
| Width           | 0.817         | 0.736        | 1      |        |               |     |
| Length          | 0.674         | 0.845        | 0.375  | 1      |               |     |
| L/W             | <b>-0.007</b> | <b>0.212</b> | -0.426 | 0.625  | 1             |     |
| FFD             | 0.728         | 0.471        | 0.473  | 0.203  | <b>-0.195</b> | 1   |

**Supplemental Table 3.** Principal components analysis. Probability loadings of principal components identified in (A) BxS, AxC, SxS, and population wide (P-W), (B) SpxR, MxC and SaxR.

|        | BxS      |          | AxC      |          | SxS      |          | P-W       |           |
|--------|----------|----------|----------|----------|----------|----------|-----------|-----------|
|        | PC1      | PC2      | PC1      | PC2      | PC1      | PC2      | PC1       | PC2       |
| TGW    | 0.96963  | 0.09604  | 0.71078  | 0.08286  | 0.96980  | 0.01311  | 0.926314  | 0.021878  |
| AREA   | 0.73682  | 0.62573  | 0.93434  | 0.26831  | 0.94781  | 0.14910  | 0.961997  | 0.153397  |
| WIDTH  | 0.95788  | 0.00678  | 0.89958  | -0.31470 | 0.81878  | -0.47310 | 0.921874  | -0.303075 |
| LENGTH | 0.12174  | 0.98159  | 0.68741  | 0.70644  | 0.68576  | 0.67865  | 0.818109  | 0.549791  |
| L/W    | -0.78478 | 0.54595  | -0.17037 | 0.97113  | -0.20490 | 0.97544  | -0.190197 | 0.975226  |
| FFD    | 0.81622  | -0.30839 | 0.80328  | -0.43154 | 0.83995  | -0.03832 | 0.88659   | -0.172279 |
| % Var. | 61.626   | 29.291   | 55.571   | 30.105   | 62.117   | 27.662   | 68.748    | 23.1315   |

  

|        | SpxR     |          | MxC      |          | SaxR    |          |
|--------|----------|----------|----------|----------|---------|----------|
|        | PC1      | PC2      | PC1      | PC2      | PC1     | PC2      |
| TGW    | 0.98184  | -0.00870 | 0.48606  | 0.04296  | 0.52517 | -0.07054 |
| AREA   | 0.94195  | 0.24697  | 0.46042  | 0.25025  | 0.51221 | 0.15005  |
| WIDTH  | 0.92316  | -0.24235 | 0.46223  | -0.18117 | 0.43038 | -0.33131 |
| LENGTH | 0.73167  | 0.66244  | 0.25064  | 0.69718  | 0.40666 | 0.47400  |
| L/W    | -0.35826 | 0.91203  | -0.29628 | 0.63961  | 0.01691 | 0.73721  |
| FFD    | 0.81329  | -0.19465 | 0.43301  | -0.08684 | 0.33309 | -0.30755 |
| % Var. | 67.144   | 23.805   | 68.4     | 24.72    | 59.23   | 29.17    |

**Supplemental Table 4.** QTL for the morphometric traits in the AxC population. QTL are annotated as follows: initials of population, year of harvest, trait, ascending number of QTL. Genome-wide LOD threshold for significant QTL was set at 3.1 after a permutation test (10,000 simulations). Position refers to the map position (cM) that corresponds to the marker with the highest LOD score with the 2-LOD confidence intervals (from-to) shown next to it.

| Chromosome | QTL              | LOD  | % explained | position | from  | to    | Effect |
|------------|------------------|------|-------------|----------|-------|-------|--------|
| 2D         | AvXC_07_Length_1 | 3.0  | 6.6         | 144.6    | 141.1 | 149.6 | 0.074  |
| 3A         | AvXC_07_Length_2 | 6.0  | 12.8        | 55.2     | 35.0  | 67.1  | 0.103  |
| 3A         | AvXC_08_Length_1 | 6.0  | 14.2        | 53.7     | 47.1  | 63.1  | 0.106  |
| 3B         | AvXC_07_Length_3 | 3.8  | 8.7         | 64.7     | 46.0  | 103.1 | 0.085  |
| 3B         | AvXC_08_Length_2 | 3.1  | 7.1         | 95.3     | 48.0  | 113.1 | 0.075  |
| 5A         | AvXC_07_Length_4 | 18.1 | 35.4        | 23.1     | 16.0  | 29.2  | -0.170 |
| 5A         | AvXC_08_Length_3 | 16.3 | 35.4        | 25.1     | 13.0  | 30.3  | -0.162 |
| 6A         | AvXC_08_Length_4 | 3.2  | 7.2         | 85.6     | 69.7  | 94.4  | -0.076 |
| 7D         | AvXC_07_Length_5 | 3.3  | 7.2         | 27.6     | 1.0   | 42.1  | -0.077 |
| 7D         | AvXC_08_Length_5 | 3.6  | 8.5         | 21.0     | 5.0   | 37.6  | -0.083 |
| 2B         | AvXC_07_Area_1   | 3.2  | 7.0         | 111.0    | 105.6 | 120.0 | -0.364 |
| 3B         | AvXC_07_Area_2   | 3.9  | 10.7        | 26.7     | 0.0   | 83.1  | 0.452  |
| 3B         | AvXC_08_Area_1   | 3.1  | 7.6         | 78.1     | 39.7  | 118.1 | 0.373  |
| 4B         | AvXC_07_Area_3   | 4.5  | 10.8        | 23.4     | 9.5   | 37.4  | -0.451 |
| 4B         | AvXC_08_Area_2   | 5.1  | 12.4        | 23.4     | 10.5  | 34.4  | -0.477 |
| 5A         | AvXC_07_Area_4   | 11.7 | 24.2        | 28.2     | 17.0  | 32.7  | -0.674 |
| 5A         | AvXC_08_Area_3   | 12.2 | 25.6        | 29.2     | 14.0  | 32.7  | -0.679 |
| 2B         | AvXC_07_TGW_1    | 3.2  | 7.1         | 111.0    | 79.3  | 120.0 | -1.368 |
| 3B         | AvXC_07_TGW_2    | 4.2  | 10.1        | 7.1      | 0.0   | 54.0  | 1.630  |
| 4B         | AvXC_07_TGW_3    | 6.2  | 14.6        | 23.4     | 3.3   | 38.1  | -1.966 |
| 4B         | AvXC_08_TGW_1    | 6.1  | 16.1        | 23.4     | 11.5  | 33.4  | -1.791 |
| 4D         | AvXC_08_TGW_2    | 3.1  | 7.4         | 0.0      | 0.0   | 13.1  | -1.245 |
| 5A         | AvXC_07_TGW_4    | 4.2  | 9.4         | 28.2     | 12.0  | 34.5  | -1.572 |
| 5A         | AvXC_08_TGW_3    | 4.8  | 11.2        | 25.1     | 2.0   | 34.5  | -1.539 |
| 6A         | AvXC_08_TGW_4    | 6.3  | 13.6        | 21.5     | 10.4  | 29.8  | 1.736  |
| 1D         | AvXC_07_Width_1  | 3.1  | 6.9         | 21.0     | 8.1   | 27.7  | -0.040 |
| 1D         | AvXC_08_Width_1  | 3.2  | 7.9         | 19.1     | 0.0   | 34.7  | -0.037 |
| 3B         | AvXC_07_Width_2  | 3.7  | 8.9         | 7.1      | 0.0   | 43.7  | 0.045  |
| 4B         | AvXC_07_Width_3  | 4.6  | 11.7        | 23.4     | 10.5  | 38.1  | -0.052 |
| 4B         | AvXC_08_Width_2  | 5.2  | 13.1        | 23.4     | 13.5  | 34.4  | -0.046 |
| 6A         | AvXC_07_Width_4  | 3.4  | 7.8         | 19.0     | 0.0   | 56.1  | 0.043  |
| 6A         | AvXC_08_Width_3  | 6.3  | 13.6        | 21.5     | 12.4  | 39.0  | 0.049  |
| 1D         | AvXC_07_L/W_1    | 3.1  | 7.0         | 0.0      | 0.0   | 26.0  | 0.020  |
| 1D         | AvXC_08_L/W_1    | 3.24 | 7.2         | 0        | 0.0   | 16.1  | 0.019  |
| 2D         | AvXC_07_L/W_2    | 6.4  | 14.8        | 144.6    | 136.3 | 151.6 | 0.030  |
| 3A         | AvXC_07_L/W_3    | 8.8  | 18.4        | 70.0     | 49.7  | 78.4  | 0.033  |
| 3A         | AvXC_08_L/W_2    | 8.6  | 18.7        | 69.3     | 48.7  | 77.4  | 0.030  |
| 5A         | AvXC_07_L/W_4    | 7.9  | 20.1        | 23.1     | 4.0   | 29.2  | -0.034 |
| 5A         | AvXC_08_L/W_3    | 6.8  | 17.4        | 18.0     | 5.0   | 32.7  | -0.029 |
| 6A         | AvXC_07_L/W_5    | 4.6  | 10.8        | 88.3     | 71.7  | 94.4  | -0.025 |
| 6A         | AvXC_08_L/W_4    | 5.6  | 12.7        | 86.6     | 74.7  | 94.4  | -0.025 |
| 7D         | AvXC_07_L/W_6    | 4.6  | 10.1        | 20.0     | 6.0   | 36.6  | -0.024 |
| 7D         | AvXC_08_L/W_5    | 3.2  | 8.9         | 20.0     | 2.0   | 39.6  | -0.019 |
| 1D         | AvXC_08_FFD_1    | 3.3  | 7.8         | 5.5      | 0.0   | 27.7  | -0.021 |
| 3A         | AvXC_07_FFD_1    | 3.0  | 6.9         | 73.4     | 60.7  | 84.4  | -0.025 |
| 3A         | AvXC_08_FFD_2    | 3.5  | 8.4         | 63.1     | 27.0  | 97.6  | -0.022 |
| 3B         | AvXC_07_FFD_2    | 3.6  | 8.6         | 8.1      | 0.0   | 43.7  | 0.027  |
| 3B         | AvXC_07_FFD_3    | 3.7  | 8.2         | 175.7    | 154.9 | 191.1 | 0.027  |
| 4B         | AvXC_08_FFD_3    | 4.0  | 10.0        | 17.5     | 0.0   | 36.4  | -0.025 |
| 4B         | AvXC_07_FFD_4    | 4.8  | 11.5        | 23.4     | 0.0   | 38.1  | -0.032 |
| 4D         | AvXC_08_FFD_4    | 5.0  | 11.9        | 3.0      | 0.0   | 13.1  | -0.027 |
| 4D         | AvXC_07_FFD_5    | 3.3  | 7.8         | 0.0      | 0.0   | 12.2  | -0.029 |
| 6A         | AvXC_08_FFD_5    | 9.9  | 20.8        | 21.0     | 13.4  | 30.0  | 0.036  |
| 6A         | AvXC_07_FFD_6    | 3.8  | 8.6         | 19.0     | 0.0   | 51.0  | 0.028  |

**Supplemental Table 5.** QTL for the morphometric traits in the SxS, and BxS populations.

| Chromosome | QTL             | LOD | % Var. | position | from | to   | Effect |
|------------|-----------------|-----|--------|----------|------|------|--------|
| 7A         | SxS_06_Length_1 | 3.4 | 20.1   | 7.0      | 0.0  | 18.0 | 0.081  |
| 7A         | SxS_07_Length_1 | 6.8 | 30.9   | 7.0      | 0.0  | 10.0 | 0.098  |
| 2D         | SxS_07_Area_2   | 3.2 | 14.4   | 4.0      | 0.0  | 4.0  | 0.348  |
| 6B         | SxS_06_Area_1   | 3.2 | 15.1   | 82.0     | 69.0 | 82.0 | -0.297 |
| 7A         | SxS_07_Area_1   | 4.7 | 23.1   | 0.0      | 0.0  | 5.0  | 0.451  |
| 5A         | SxS_07_TGW_1    | 3.3 | 20.6   | 8.0      | 3.0  | 13.0 | -1.919 |
| 7A         | SxS_06_TGW_1    | 3.7 | 19.1   | 1.0      | 0.0  | 18.0 | 1.277  |
| 7B         | SxS_06_Width_1  | 3.3 | 18.9   | 20.0     | 9.0  | 37.0 | -0.041 |
| 5A         | SxS_07_Width_1  | 3.7 | 18.3   | 34.0     | 27.0 | 36.0 | -0.061 |
| 5A         | SxS_06_L/W_1    | 3.8 | 30.0   | 20.0     | 4.0  | 43.0 | 0.035  |
| 5A         | SxS_07_L/W_1    | 4.4 | 29.8   | 36.0     | 27.0 | 45.0 | 0.033  |
| 3D         | SxS_06_FFD_1    | 4.0 | 23.6   | 2.0      | 0.0  | 9.0  | -0.030 |
| 5A         | SxS_07_FFD_1    | 3.6 | 22.9   | 8.0      | 3.0  | 13.0 | -0.048 |
| 1A         | BxS_07_Length_1 | 4.6 | 29.4   | 36.0     | 19.0 | 45.0 | -0.118 |
| 1A         | BxS_08_Length_1 | 2.4 | 15.8   | 25.0     | 17.0 | 31.0 | -0.091 |
| 2D         | BxS_08_Length_2 | 4.3 | 26.1   | 8.0      | 0.0  | 28.0 | -0.118 |
| 4B         | BxS_07_Area_1   | 3.6 | 26.9   | 22.0     | 8.0  | 27.0 | -0.532 |
| 3A         | BxS_07_TGW_1    | 4.2 | 27.9   | 8.0      | 0.0  | 26.0 | 0.919  |
| 4B         | BxS_07_TGW_2    | 5.1 | 34.0   | 19.0     | 9.0  | 27.0 | -2.606 |
| 4B         | BxS_08_TGW_1    | 5.1 | 34.1   | 18.0     | 0.0  | 27.0 | -2.241 |
| 3A         | BxS_07_Width_1  | 3.1 | 21.1   | 17.0     | 0.0  | 42.0 | -0.079 |
| 4B         | BxS_07_Width_2  | 6.0 | 41.1   | 20.0     | 9.0  | 27.0 | -0.112 |
| 4B         | BxS_08_Width_1  | 9.3 | 50.2   | 16.0     | 12.0 | 24.0 | -0.088 |
| 2D         | BxS_07_L/W_1    | 3.8 | 23.5   | 20.0     | 0.0  | 30.0 | -0.060 |
| 2D         | BxS_08_L/W_1    | 3.3 | 20.9   | 20.0     | 2.0  | 31.0 | -0.037 |
| 4B         | BxS_07_L/W_2    | 3.9 | 24.1   | 13.0     | 0.0  | 27.0 | 0.062  |
| 4B         | BxS_08_L/W_2    | 5.6 | 32.8   | 14.0     | 5.0  | 24.0 | 0.048  |
| 2D         | BxS_08_FFD_1    | 3.4 | 21.6   | 14.0     | 0.0  | 29.0 | 0.039  |
| 3A         | BxS_07_FFD_1    | 4.7 | 31.6   | 6.0      | 0.0  | 24.0 | -0.071 |
| 4B         | BxS_07_FFD_2    | 3.9 | 25.1   | 0.0      | 0.0  | 27.0 | -0.063 |
| 4B         | BxS_08_FFD_2    | 4.3 | 26.2   | 14.0     | 0.0  | 27.0 | -0.044 |

**Supplemental Table 6.** QTL for the morphometric traits in the SpXR, MxC, and SaxR population.

| Chromosome | QTL              | LOD | % Var. | position | from | to    | Effect |
|------------|------------------|-----|--------|----------|------|-------|--------|
| 1A         | SpXR_07_Length_1 | 3.8 | 14.2   | 11.6     | 0.0  | 21.6  | -0.067 |
| 5A         | SpXR_07_Length_2 | 3.1 | 11.3   | 1.0      | 0.0  | 25.5  | 0.067  |
| 1B         | SpXR_07_Area_1   | 4.0 | 15.4   | 20.6     | 0.0  | 24.7  | -0.381 |
| 5A         | SpXR_07_Area_2   | 3.8 | 16.2   | 7.0      | 0.0  | 30.5  | 0.390  |
| 1B         | SpXR_07_TGW_1    | 3.5 | 14.0   | 0.0      | 0.0  | 26.7  | -1.369 |
| 4D         | SpXR_07_TGW_2    | 3.2 | 12.6   | 33.0     | 0.0  | 47.0  | 1.297  |
| 5A         | SpXR_07_TGW_3    | 4.2 | 17.5   | 7.0      | 0.0  | 27.5  | 1.529  |
| 1B         | SpXR_07_Width_1  | 3.5 | 14.8   | 1.0      | 0.0  | 25.7  | -0.047 |
| 5A         | SpXR_07_Width_2  | 3.9 | 15.9   | 13.5     | 0.0  | 32.5  | 0.048  |
| 4D         | SpXR_07_FFD_1    | 3.9 | 17.1   | 24.0     | 3.0  | 39.0  | 0.036  |
| 2A         | MxC_08_TGW_1     | 6.3 | 34.9   | 45.0     | 23.0 | 63.0  | 2.324  |
| 6A         | MxC_08_TGW_2     | 2.9 | 13.2   | 31.0     | 18.0 | 50.0  | -1.499 |
| 2A         | MxC_08_Area_1    | 4.3 | 27.4   | 45.0     | 10.0 | 65.0  | 0.477  |
| 6A         | MxC_08_Area_2    | 2.9 | 13.8   | 29.0     | 6.0  | 54.0  | 0.942  |
| 2A         | MxC_08_Width_1   | 3.5 | 22.3   | 48.0     | 9.0  | 83.0  | 0.066  |
| 3A         | MxC_08_Width_2   | 3.6 | 18.5   | 94.0     | 73.0 | 101.0 | -0.061 |
| 2B         | MxC_08_Length_1  | 3.1 | 12.5   | 37.0     | 20.0 | 58.0  | -0.060 |
| 2A         | MxC_08_L/W_1     | 5.5 | 23.9   | 40.0     | 10.0 | 46.0  | -0.033 |
| 3A         | MxC_08_L/W_2     | 3.7 | 20.8   | 94.0     | 78.0 | 101.0 | 0.031  |
| 2A         | MxC_08_FFD_1     | 5.5 | 29.6   | 45.0     | 10.0 | 65.0  | 0.052  |
| 5A         | SaxR_08_TGW_1    | 3.9 | 19.5   | 12.0     | 0.0  | 37.0  | 1.577  |
| 6A         | SaxR_08_TGW_2    | 3.4 | 19.0   | 43.0     | 8.0  | 77.0  | 1.570  |
| 5A         | SaxR_08_Area_1   | 4.0 | 19.3   | 10.0     | 0.0  | 42.0  | 0.459  |
| 5A         | SaxR_08_Width_1  | 3.9 | 18.8   | 5.0      | 0.0  | 21.0  | 0.050  |
| 6A         | SaxR_08_Width_2  | 3.0 | 20.9   | 37.0     | 2.0  | 80.0  | 0.053  |
| 3A         | SaxR_08_Length_1 | 4.4 | 19.4   | 70.0     | 52.0 | 94.0  | -0.097 |
| 5A         | SaxR_08_Length_2 | 2.8 | 13.4   | 61.0     | 48.0 | 61.0  | 0.080  |
| 7A         | SaxR_08_Length_3 | 3.4 | 15.8   | 60.0     | 39.0 | 102.0 | -0.086 |
| 1A         | SaxR_08_L/W_1    | 3.5 | 16.3   | 25.0     | 10.0 | 46.0  | -0.023 |
| 2A         | SaxR_08_L/W_2    | 3.2 | 15.1   | 15.0     | 0.0  | 17.0  | -0.022 |
| 7A         | SaxR_08_L/W_3    | 4.4 | 21.7   | 78.0     | 59.0 | 102.0 | -0.026 |
| 6A         | SaxR_08_FFD_1    | 3.1 | 14.2   | 50.0     | 25.0 | 72.0  | 0.023  |



**Supplemental Table 7.** QTL for the principal components in the AxC, SxS, BxS, SpxR, MxC and SaxR populations.

| Chromosome | trait      | LOD  | % Var. | position | from  | to    | Effect |
|------------|------------|------|--------|----------|-------|-------|--------|
| 3B         | AvXC_PC1_1 | 3.6  | 9.5    | 31.7     | 0.0   | 82.1  | 0.29   |
| 4B         | AvXC_PC1_2 | 6.1  | 14.4   | 23.4     | 10.5  | 35.4  | -0.36  |
| 5A         | AvXC_PC1_3 | 7.5  | 16.2   | 28.2     | 13.0  | 33.7  | -0.39  |
| 6A         | AvXC_PC1_4 | 3.6  | 7.9    | 21.5     | 0.0   | 40.0  | 0.27   |
| 1D         | AvXC_PC2_1 | 3.2  | 7.3    | 0.0      | 0.0   | 22.0  | 0.26   |
| 2D         | AvXC_PC2_2 | 4.9  | 11.4   | 144.6    | 133.7 | 155.5 | 0.31   |
| 3A         | AvXC_PC2_3 | 10.6 | 22.5   | 69.3     | 48.7  | 77.4  | 0.45   |
| 5A         | AvXC_PC2_4 | 10.3 | 25.5   | 18.0     | 7.0   | 28.2  | -0.48  |
| 6A         | AvXC_PC2_5 | 4.9  | 11.6   | 85.6     | 71.7  | 94.4  | -0.31  |
| 7A         | SxS_PC1_1  | 3.6  | 23.4   | 1.0      | 0.0   | 18.0  | 0.35   |
| 5A         | SxS_PC2_1  | 4.1  | 29.7   | 20.0     | 3.0   | 43.0  | 0.51   |
| 3A         | BxS_PC1_1  | 4.0  | 26.8   | 13.0     | 0.0   | 25.0  | -1.04  |
| 4B         | BxS_PC1_2  | 5.7  | 36.4   | 18.0     | 8.0   | 27.0  | -1.22  |
| 1A         | BxS_PC2_1  | 4.6  | 29.2   | 36.0     | 19.0  | 45.0  | 0.72   |
| 1B         | SpxR_PC1_1 | 3.9  | 14.9   | 20.6     | 0.0   | 25.7  | -0.39  |
| 5A         | SpxR_PC1_2 | 4.4  | 18.2   | 5.0      | 0.0   | 26.5  | 0.43   |
| 1A         | SpxR_PC2_1 | 3.5  | 11.3   | 7.5      | 0.0   | 10.5  | -0.34  |
| 3A         | SpxR_PC2_2 | 2.9  | 9.2    | 58.8     | 54.9  | 60.5  | -0.31  |
| 2A         | MxC_PC1_1  | 4.3  | 20.6   | 46.0     | 7.0   | 69.0  | 0.93   |
| 6A         | MxC_PC1_2  | 3.3  | 15.1   | 31.0     | 26.0  | 39.0  | -0.78  |
| 2B         | MxC_PC2_1  | 5.6  | 23.2   | 32.0     | 17.0  | 51.0  | -0.58  |
| 5A         | SaxR_PC1_1 | 4.2  | 20.5   | 11.0     | 0.0   | 22.0  | 0.86   |
| 6A         | SaxR_PC1_2 | 3.1  | 18.3   | 40.0     | 5.0   | 87.0  | 0.82   |
| 1A         | SaxR_PC2_1 | 4.1  | 18.5   | 24.0     | 7.0   | 67.0  | -0.57  |
| 7A         | SaxR_PC2_2 | 4.6  | 22.1   | 79.0     | 67.0  | 102.0 | -0.62  |

Supplemental Table 8. Morphometric data on *Triticum* species.

| Accession No | Species <sup>a</sup>  | ssp/var                         | Area (mm <sup>2</sup> ) <sup>b</sup> |       |                 | Length (mm) |       |                 | Width (mm) |       |                 | L/W  |       |                 |
|--------------|-----------------------|---------------------------------|--------------------------------------|-------|-----------------|-------------|-------|-----------------|------------|-------|-----------------|------|-------|-----------------|
|              |                       |                                 | Mean                                 | Stdev | Range (min-max) | Mean        | Stdev | Range (min-max) | Mean       | Stdev | Range (min-max) | Mean | Stdev | Range (min-max) |
| 1010002      | <i>T. urartu</i>      |                                 | 14.7                                 | 1.80  | 6.0(1.4-17.4)   | 7.6         | 0.55  | 1.9(6.8-8.4)    | 2.2        | 0.24  | 0.8(1.8-2.6)    | 3.5  | 0.31  | 1.3(0.4-3)      |
| 1020003      | <i>T. boeoticum</i>   | <i>thaoudar luteoglumis</i>     | 25.2                                 | 4.1   | 16.3(17.1-33.4) | 9.5         | 0.6   | 3.1(8.1-11.2)   | 3.3        | 0.5   | 1.8(2.4-4.2)    | 2.9  | 0.4   | 1.6(2.3-3.8)    |
| 1030001      | <i>T. boeoticum</i>   | <i>aegilopoides</i>             | 26.2                                 | 2.40  | 8.4(22.1-30.5)  | 9.4         | 0.44  | 2.1(8.3-10.4)   | 3.5        | 0.31  | 1.5(2.5-4.0)    | 2.7  | 0.27  | 1.5(2.2-3.8)    |
| 1030004      | <i>T. boeoticum</i>   | <i>aegilopoides Lerionowi</i>   | 18.8                                 | 2.3   | 9.2(13.4-22.6)  | 7.7         | 0.7   | 3.1(6.2-9.3)    | 3.1        | 0.4   | 1.8(2.1-3.9)    | 2.5  | 0.4   | 1.7(1.9-3.6)    |
| 1030005      | <i>T. boeoticum</i>   | <i>aegilopoides heleno</i>      | 22.6                                 | 2.6   | 8.2(18.6-26.8)  | 9.7         | 0.5   | 1.5(9.2-10.7)   | 2.7        | 0.3   | 0.9(2.2-3.1)    | 3.6  | 0.3   | 1.0(3.2-4.2)    |
| 1030022      | <i>T. boeoticum</i>   | <i>aegilopoides mayssuriani</i> | 20.6                                 | 2.0   | 8.9(15.9-24.8)  | 8.2         | 0.4   | 2(7.3-9.3)      | 3.2        | 0.4   | 1.6(2.4-3)      | 2.6  | 0.3   | 1.2(2.1-3.3)    |
| 1020001      | <i>T. boeoticum</i>   |                                 | 21.1                                 | 2.1   | 6.5(18-24.5)    | 8.5         | 0.5   | 1.7(7.7-9.4)    | 3.1        | 0.3   | 0.8(2.6-3.4)    | 2.8  | 0.2   | 0.9(2.4-3.3)    |
| 1020004      | <i>T. boeoticum</i>   | <i>thaoudar</i>                 | 24.1                                 | 2.0   | 6.3(20.1-26.4)  | 9.7         | 0.3   | 0.9(9.2-10.4)   | 3.0        | 0.3   | 1(2.4-3.4)      | 3.3  | 0.3   | 1(2.9-4.0)      |
| 1030027      | <i>T. boeoticum</i>   | <i>aegilopoides</i>             | 21.0                                 | 3.0   | 13.9(15.3-29.2) | 8.8         | 0.7   | 3(7.4-10.4)     | 2.9        | 0.3   | 1.3(2.1-3.4)    | 3.1  | 0.2   | 1.0(2.6-3.6)    |
| 1040004      | <i>T. monococcum</i>  | <i>flavescens</i>               | 22.7                                 | 1.3   | 4.8(19.2-24)    | 8.1         | 0.2   | 0.8(7.6-8.4)    | 3.6        | 0.2   | 0.9(2.9-3.8)    | 2.3  | 0.1   | 0.7(2.1-2.8)    |
| 1040005      | <i>T. monococcum</i>  | <i>flavescens</i>               | 23.3                                 | 1.9   | 7.3(18.9-26.2)  | 8.5         | 0.5   | 2.2(7.3-9.5)    | 3.4        | 0.2   | 1.1(2.7-3.8)    | 2.5  | 0.3   | 1.3(2.2-3.5)    |
| 1040008      | <i>T. monococcum</i>  | <i>Hornemannii</i>              | 20.2                                 | 1.9   | 6.3(16.9-23.2)  | 8.2         | 0.6   | 3(7-10)         | 3.1        | 0.3   | 1.2(2.4-3.6)    | 2.7  | 0.4   | 1.6(2.1-3.7)    |
| 1040011      | <i>T. monococcum</i>  |                                 | 20.9                                 | 1.80  | 6.3(17.8-24.1)  | 8.2         | 0.43  | 2.0(7.2-9.2)    | 3.2        | 0.26  | 1.0(2.7-3.7)    | 2.6  | 0.20  | 0.8(2.1-2.9)    |
| 1040019      | <i>T. monococcum</i>  | <i>soflanum</i>                 | 21.1                                 | 1.8   | 8.4(16-24.4)    | 7.8         | 0.4   | 1.6(7-8.6)      | 3.5        | 0.2   | 1.3(2.6-3.9)    | 2.2  | 0.2   | 0.8(2-2.8)      |
| 1040020      | <i>T. monococcum</i>  | <i>hordeumforme</i>             | 16.6                                 | 1.3   | 5.3(13.3-18.6)  | 6.9         | 0.4   | 1.7(5.9-7.6)    | 2.9        | 0.2   | 0.6(2.6-3.2)    | 2.4  | 0.1   | 0.6(2.1-2.7)    |
| 1040021      | <i>T. monococcum</i>  | <i>nigrilaristatum</i>          | 24.3                                 | 2.3   | 10.7(16.6-27.3) | 8.3         | 0.4   | 1.8(7.3-9.1)    | 3.8        | 0.4   | 1.6(2.9-4.5)    | 2.2  | 0.3   | 1.1(1.9-2.9)    |
| 1040022      | <i>T. monococcum</i>  | <i>macedonicum</i>              | 24.0                                 | 2.5   | 10.7(18.1-28.8) | 8.5         | 0.5   | 2.2(7.3-9.5)    | 3.6        | 0.4   | 1.6(2.7-4.3)    | 2.3  | 0.2   | 1.1(2.0-3.1)    |
| 1040023      | <i>T. monococcum</i>  | <i>aljaristatum</i>             | 21.1                                 | 1.4   | 6.1(17.1-23.2)  | 8.3         | 0.3   | 1.4(7.3-8.7)    | 3.2        | 0.2   | 1.1(2.5-3.6)    | 2.6  | 0.2   | 1.1(2.2-3.3)    |
| 1040025      | <i>T. monococcum</i>  | <i>nigricultum</i>              | 23.5                                 | 2.6   | 9.7(17.2-26.9)  | 8.7         | 0.5   | 2.4(7.1-9.5)    | 3.4        | 0.4   | 1.6(2.4-4)      | 2.6  | 0.3   | 1.3(2.2-3.5)    |
| 1040026      | <i>T. monococcum</i>  | <i>soflanum</i>                 | 23.9                                 | 2.6   | 11.5(16.9-28.4) | 8.7         | 0.4   | 1.9(7.6-9.5)    | 3.6        | 0.4   | 1.6(2.6-4.2)    | 2.5  | 0.3   | 1.2(2.0-3.3)    |
| 1040027      | <i>T. monococcum</i>  | <i>Hornemannii</i>              | 21.9                                 | 1.8   | 9.3(16.6-25.9)  | 7.3         | 0.5   | 2.1(7.2-9.3)    | 3.5        | 0.2   | 1.5(2.6-4.1)    | 2.4  | 0.3   | 1.5(2-3.5)      |
| 1040028      | <i>T. monococcum</i>  | <i>flavescens</i>               | 22.7                                 | 1.9   | 8.7(17.1-25.8)  | 7.7         | 0.7   | 1.4(6.9-8.3)    | 3.8        | 0.3   | 1.5(2.9-4.4)    | 2.0  | 0.2   | 0.8(1.7-2.5)    |
| 1040031      | <i>T. monococcum</i>  | <i>laetissimum</i>              | 22.9                                 | 3.3   | 21.3(6-27.3)    | 8.4         | 0.7   | 4.6(4.8-9.4)    | 3.5        | 0.5   | 2.9(1.1-4)      | 2.4  | 0.4   | 2.3(2.1-4.4)    |
| 1040032      | <i>T. monococcum</i>  | <i>laetissimum</i>              | 19.8                                 | 2.3   | 8.7(15.5-24.2)  | 8.2         | 0.5   | 2(7.1-9.1)      | 3.0        | 0.3   | 1.4(2.4-3.8)    | 2.8  | 0.3   | 1.6(2.1-3.7)    |
| 1060007      | <i>T. dicoccoides</i> |                                 | 25.6                                 | 3.01  | 12.5(18.2-30.7) | 9.8         | 0.56  | 3.2(7.5-10.7)   | 3.2        | 0.40  | 1.9(2.1-4.0)    | 3.1  | 0.39  | 2.0(2.4-4.4)    |
| 1060010      | <i>T. dicoccoides</i> | <i>Aaronsolia</i>               | 21.8                                 | 3.3   | 18.5(11.6-30.1) | 9.3         | 0.6   | 2.8(7.5-10.3)   | 3.4        | 0.4   | 2.8(1.8-4.6)    | 3.0  | 0.4   | 1.8(2.3-4.1)    |
| 1060009      | <i>T. dicoccoides</i> | <i>fulvovillosum</i>            | 25.6                                 | 3.6   | 12.9(16.8-29.7) | 8.9         | 0.6   | 2.8(7.2-10)     | 3.0        | 0.4   | 1.8(2.1-3.9)    | 2.8  | 0.3   | 2.1(2.1-4.2)    |
| 1060011      | <i>T. dicoccoides</i> | <i>spontaneonigrum</i>          | 23.0                                 | 5.4   | 26.6(4.7-31.3)  | 9.4         | 1.4   | 7.6(3-10.6)     | 2.9        | 0.4   | 2.2(1.7-3.9)    | 3.3  | 0.4   | 2.2(1.8-3.9)    |
| 1070001      | <i>T. dicoccoides</i> |                                 | 22.9                                 | 2.18  | 8.7(19.5-28.2)  | 8.5         | 0.50  | 2.3(7.1-9.4)    | 3.5        | 0.29  | 1.2(3.0-4.2)    | 2.4  | 0.22  | 0.7(2.0-2.8)    |
| 1080060      | <i>T. dicoccoides</i> | <i>speciosum</i>                | 26.6                                 | 3.03  | 14.5(20.4-34.9) | 8.4         | 0.54  | 2.4(7.1-9.5)    | 3.9        | 0.38  | 1.6(3.2-4.8)    | 2.2  | 0.20  | 1.0(1.6-2.6)    |
| 1080061      | <i>T. dicoccoides</i> | <i>dinurum</i>                  | 24.4                                 | 2.63  | 12.9(17.1-30.0) | 7.4         | 0.40  | 2.2(6.0-8.2)    | 4.1        | 0.39  | 1.9(3.3-5.2)    | 1.8  | 0.14  | 0.5(1.4-2.0)    |
| 1090007      | <i>T. turgidum</i>    | <i>carthicum</i>                | 18.8                                 | 2.39  | 9.3(14.0-23.3)  | 6.8         | 0.42  | 2.5(5.4-7.9)    | 3.5        | 0.35  | 1.3(2.8-4.1)    | 2.0  | 0.17  | 0.6(1.6-2.3)    |
| 1100002      | <i>T. turgidum</i>    | <i>polonicum</i>                | 31.6                                 | 3.49  | 14.4(25.3-39.7) | 10.4        | 0.90  | 4.3(8.7-13)     | 3.8        | 0.21  | 0.9(3.4-4.3)    | 2.7  | 0.26  | 1.1(2.3-3.4)    |
| 1100001      | <i>T. turgidum</i>    | <i>turanicum</i>                | 27.1                                 | 4.10  | 18.2(17.3-35.5) | 8.4         | 0.70  | 3.0(6.8-9.8)    | 4.0        | 0.42  | 1.8(3.0-4.8)    | 2.1  | 0.21  | 0.9(1.7-2.6)    |
| 1140001      | <i>T. turgidum</i>    | <i>durum</i>                    | 22.9                                 | 4.47  | 27.4(5.8-32.2)  | 8.4         | 0.67  | 5.5(4.3-9.8)    | 3.4        | 0.59  | 3.6(1.1-4.7)    | 2.5  | 0.39  | 2.0(1.8-3.9)    |
| 1120002      | <i>T. isphanicum</i>  | <i>biaristatum</i>              | 27.0                                 | 2.22  | 9.0(22.4-31.4)  | 11.0        | 0.41  | 1.7(10.0-11.7)  | 3.0        | 0.31  | 1.3(2.4-3.7)    | 3.7  | 0.35  | 1.2(3.1-4.3)    |
| 1130001      | <i>T. isphanicum</i>  | <i>uniaristatum</i>             | 19.1                                 | 2.23  | 9.1(13.2-22.3)  | 8.2         | 0.52  | 2.4(6.8-9.2)    | 2.8        | 0.27  | 1.1(2.1-3.2)    | 3.0  | 0.28  | 1.1(2.5-3.7)    |
| 1150001      | <i>T. araraticum</i>  | <i>tumaniani</i>                | 19.1                                 | 1.85  | 7.4(16.0-23.4)  | 9.4         | 0.45  | 1.7(8.4-10.1)   | 2.3        | 0.24  | 0.9(1.9-2.8)    | 4.2  | 0.47  | 1.9(3.2-5.2)    |
| 1150002      | <i>T. araraticum</i>  | <i>nachthevanicum</i>           | 24.6                                 | 2.43  | 7.6(19.7-27.3)  | 9.7         | 0.39  | 1.3(9.1-10.4)   | 3.1        | 0.40  | 1.2(2.5-3.7)    | 3.1  | 0.44  | 1.3(2.6-4.0)    |
| 1160004      | <i>T. timopheevi</i>  | <i>typicum</i>                  | 21.3                                 | 1.95  | 8.7(16.7-25.4)  | 9.2         | 0.42  | 2.1(7.9-10.0)   | 2.7        | 0.28  | 1.1(2.3-3.4)    | 3.4  | 0.36  | 1.3(2.7-4.0)    |
| 1170001      | <i>T. millinae</i>    | <i>millinae</i>                 | 24.1                                 | 2.68  | 12.4(18.5-30.9) | 9.0         | 0.68  | 2.7(7.6-10.3)   | 3.2        | 0.32  | 1.3(2.6-3.9)    | 2.8  | 0.34  | 1.5(2.2-3.7)    |
| 1190844      | <i>T. aestivum</i>    | <i>aestivum</i>                 | 22.7                                 | 3.01  | 11.9(16.4-28.3) | 7.3         | 0.51  | 2.4(6.2-8.6)    | 3.5        | 0.40  | 1.9(3.1-5.0)    | 1.9  | 0.18  | 0.6(1.5-2.2)    |
| 1210001      | <i>T. aestivum</i>    | <i>sphaerococcum</i>            | 15.5                                 | 2.3   | 6.9(14.4-21.3)  | 5.4         | 0.42  | 1.9(4.7-6.6)    | 3.9        | 0.40  | 2.4(2.4-4.8)    | 1.5  | 0.34  | 0.6(1.4-2.0)    |
| N/A          | <i>T. aestivum</i>    | <i>sphaerococcum</i>            | 18.5                                 | 3     | 7.2(16.4-23.6)  | 6.2         | 0.31  | 1.7(5.1-6.9)    | 3.7        | 0.23  | 1.2(2.6-3.8)    | 1.7  | 0.23  | 0.4(1.6-2.0)    |
| N/A          | <i>T. aestivum</i>    | <i>compactum</i>                | 19.6                                 | 4.3   | 10.5(15.8-26.3) | 6.7         | 0.6   | 0.6(6.7-7.2)    | 3.6        | 0.56  | 1.9(2.8-4.7)    | 1.9  | 0.39  | 0.5(1.6-2.1)    |
| 1240001      | <i>T. aestivum</i>    | <i>mecha</i>                    | 25.1                                 | 2.65  | 11.8(18.7-30.5) | 8.9         | 0.64  | 2.8(7.4-10.2)   | 3.4        | 0.26  | 1.2(2.9-4.1)    | 2.6  | 0.22  | 0.9(2.1-3.1)    |
| 1220007      | <i>T. aestivum</i>    | <i>spelta</i>                   | 27.7                                 | 2.70  | 9.7(22.7-32.4)  | 9.3         | 0.47  | 1.9(8.3-10.2)   | 3.7        | 0.33  | 1.3(3.2-4.5)    | 2.6  | 0.18  | 0.7(2.0-2.8)    |
| 1230001      | <i>T. vavilovii</i>   | <i>var mirabile</i>             | 27.5                                 | 2.71  | 12.7(20.5-33.2) | 8.3         | 0.50  | 2.2(7.0-9.2)    | 4.1        | 0.29  | 1.2(3.6-4.8)    | 2.0  | 0.15  | 0.6(1.7-2.3)    |
| 1260001      | <i>T. zhukovskiyi</i> |                                 | 33.1                                 | 3.17  | 13.7(23.9-37.6) | 10.9        | 0.86  | 3.6(8.4-12.0)   | 3.8        | 0.41  | 1.6(2.9-4.5)    | 2.9  | 0.38  | 1.4(2.2-3.7)    |
|              | Mean                  |                                 | 22.81                                |       |                 | 8.52        |       |                 | 3.33       |       |                 | 2.63 |       |                 |
|              | S.D                   |                                 | 3.58                                 |       |                 | 1.10        |       |                 | 0.43       |       |                 | 0.55 |       |                 |
|              | Min.                  |                                 | 14.69                                |       |                 | 5.40        |       |                 | 2.18       |       |                 | 1.54 |       |                 |
|              | Max.                  |                                 | 33.08                                |       |                 | 11.03       |       |                 | 4.12       |       |                 | 4.19 |       |                 |
|              | Range                 |                                 | 18.39                                |       |                 | 5.63        |       |                 | 1.94       |       |                 | 2.64 |       |                 |

### Supplemental Table 8

<sup>a</sup>The species taxonomy follows the classification appeared in the John Innes Centre Triticeae Collection (<http://data.jic.bbsrc.ac.uk/cgi-bin/germplasm/triticeae/>).

<sup>b</sup>Values represent the mean of 20-30 grains.

**Supplemental Table 9.** Morphometric data on sixty one commercial varieties. Values represent the mean of 200-250 grains.

| Varieties                | TGW   | Area  | Width | Length | L/W  |
|--------------------------|-------|-------|-------|--------|------|
| ALBA                     | 56.50 | 23.80 | 4.30  | 7.10   | 1.65 |
| ALBATROSS                | 51.70 | 23.50 | 4.10  | 7.30   | 1.78 |
| AVALON                   | 57.02 | 24.90 | 4.10  | 7.50   | 1.83 |
| BEAVER                   | 48.11 | 23.90 | 4.00  | 7.40   | 1.85 |
| CADENZA                  | 49.93 | 23.60 | 4.10  | 7.30   | 1.78 |
| CALIF                    | 50.41 | 23.30 | 4.10  | 7.10   | 1.73 |
| CAPO                     | 49.33 | 22.90 | 3.90  | 7.20   | 1.85 |
| CEZANNE                  | 50.09 | 23.70 | 4.10  | 7.20   | 1.76 |
| CHARGER                  | 47.28 | 22.50 | 4.00  | 7.00   | 1.75 |
| COURT JOT                | 52.90 | 24.00 | 4.00  | 7.60   | 1.90 |
| ELITE LEUPE              | 50.70 | 24.10 | 4.10  | 7.30   | 1.78 |
| ERLA KOLBEN              | 55.63 | 24.60 | 4.20  | 7.40   | 1.76 |
| ERLA KOLBEN              | 54.68 | 24.40 | 4.20  | 7.30   | 1.74 |
| ESCORIAL                 | 52.49 | 24.70 | 4.10  | 7.60   | 1.85 |
| ETOILE DE CHOISY         | 53.99 | 24.90 | 4.10  | 7.60   | 1.85 |
| EXTREM                   | 51.23 | 23.00 | 4.20  | 7.00   | 1.67 |
| FANAL                    | 56.60 | 24.80 | 4.20  | 7.40   | 1.76 |
| FLAIR                    | 53.76 | 24.90 | 4.10  | 7.40   | 1.80 |
| FLAME                    | 47.15 | 22.30 | 3.90  | 7.10   | 1.82 |
| FLAMINGO                 | 53.76 | 23.00 | 4.00  | 7.20   | 1.80 |
| FLORIDA                  | 55.27 | 24.70 | 4.10  | 7.50   | 1.83 |
| HEReward                 | 41.65 | 21.30 | 3.80  | 6.90   | 1.82 |
| HOBBIT                   | 48.78 | 24.40 | 4.00  | 7.70   | 1.93 |
| HOLDFAST                 | 41.94 | 20.70 | 3.80  | 6.80   | 1.79 |
| JOSS CAMBIER             | 47.63 | 22.50 | 4.00  | 7.10   | 1.78 |
| KAWKAS (KAVKAZ)          | 55.52 | 25.40 | 4.10  | 7.70   | 1.88 |
| KONTRAST                 | 46.17 | 21.40 | 4.00  | 6.70   | 1.68 |
| LEDA                     | 53.74 | 22.90 | 4.30  | 6.80   | 1.58 |
| MAHNDORFER TEMPO         | 52.29 | 23.30 | 4.10  | 7.20   | 1.76 |
| MARCO                    | 47.04 | 23.10 | 4.10  | 7.20   | 1.76 |
| MARIS WIDGEON            | 50.70 | 23.20 | 4.00  | 7.30   | 1.83 |
| MEGA                     | 65.71 | 27.40 | 4.30  | 8.10   | 1.88 |
| MINISTER                 | 49.10 | 23.80 | 4.00  | 7.50   | 1.88 |
| MIRAS                    | 57.53 | 25.70 | 4.20  | 7.70   | 1.83 |
| MIRONOWSKAJA JUBILEJNAJA | 62.45 | 27.30 | 4.20  | 8.10   | 1.93 |
| MUCK                     | 45.81 | 22.10 | 3.90  | 7.00   | 1.79 |
| MULTIWEISS               | 50.39 | 23.40 | 4.00  | 7.20   | 1.80 |
| NAUTICA                  | 57.41 | 25.30 | 4.20  | 7.60   | 1.91 |
| OBELISK                  | 52.46 | 23.90 | 4.10  | 7.30   | 1.78 |
| ORLANDO                  | 53.09 | 23.90 | 4.20  | 7.20   | 1.71 |
| PALUR                    | 50.57 | 23.60 | 4.10  | 7.30   | 1.78 |
| PERLO                    | 57.35 | 24.60 | 4.20  | 7.50   | 1.79 |
| RABE                     | 51.99 | 22.90 | 4.30  | 6.90   | 1.60 |
| RECITAL                  | 43.47 | 20.80 | 3.90  | 6.60   | 1.69 |
| RENAN                    | 57.83 | 25.90 | 4.10  | 8.00   | 1.95 |
| RIBAND                   | 56.09 | 24.40 | 4.30  | 7.10   | 1.65 |
| RIMPAUS BRAUN            | 46.29 | 22.60 | 4.00  | 7.20   | 1.80 |
| SCHWEIGERS TACA          | 54.65 | 24.40 | 4.10  | 7.60   | 1.85 |
| SLEJPIER                 | 47.57 | 22.80 | 4.00  | 7.30   | 1.83 |
| SOTISSONS                | 48.95 | 22.30 | 3.90  | 7.20   | 1.85 |
| SFERBER                  | 52.19 | 23.40 | 4.20  | 7.00   | 1.67 |
| STAMM 101                | 54.62 | 23.70 | 4.20  | 7.00   | 1.67 |
| STARKE II                | 44.49 | 22.00 | 3.90  | 7.00   | 1.79 |
| STEADFAST                | 53.50 | 24.10 | 4.10  | 7.50   | 1.83 |
| SVALE                    | 50.44 | 23.30 | 4.10  | 7.20   | 1.76 |
| TADORNA                  | 50.40 | 23.10 | 4.00  | 7.20   | 1.80 |
| TARAS                    | 55.65 | 24.50 | 4.30  | 7.20   | 1.67 |
| TREMIÉ                   | 49.88 | 22.90 | 4.10  | 7.00   | 1.71 |
| TSCHERMAKS WEISSER       | 57.35 | 25.10 | 4.10  | 7.70   | 1.88 |
| VILMORIN 27              | 49.52 | 23.30 | 4.20  | 7.50   | 1.79 |
| VIRGO                    | 56.23 | 24.80 | 4.00  | 7.30   | 1.83 |
| WERLA                    | 56.23 | 24.80 | 4.20  | 7.40   | 1.76 |
| Mean                     | 52.00 | 23.74 | 4.08  | 7.29   | 1.78 |
| SD                       | 4.62  | 1.320 | 0.12  | 0.30   | 0.07 |
| Min                      | 41.6  | 20.70 | 3.80  | 6.60   | 1.58 |
| Max                      | 65.71 | 27.40 | 4.30  | 8.10   | 1.95 |
| Range                    | 24.06 | 6.7   | 0.50  | 1.50   | 0.36 |

**Supplemental Text 1.** Details of the QTL locations and effects on each homoeologous group and their corresponding meta-QTL.

#### Homoeologous group 1

Grain length QTL were identified in the distal region of chromosome 1A in at least two populations. In the SpXR population a significant effect in the region of marker *wPt-4765* was found (14.2% variation explained) with the Spark allele decreasing grain length (Supplemental Figure 3C). In the BxS population a QTL was identified in both years that explained between 15.8% and 29.4% of the phenotypic variation in grain length with the Beaver allele having the decreasing effect (Supplemental Figure 3A). In the AxC population a suggestive QTL (LOD=2.46) was also present over two years at the same region of chromosome 1A with the Avalon allele decreasing grain length. Moreover, an effect was detected on 1A in the SaxR population, which explained 16.3% of the L/W variation with Savannah contributing the decreasing allele (Supplemental Figure 3E). Meta-analysis identified two meta-QTL for grain length that spanned the intervals *barc263-wPt7030* and *wPt8347-s12/m25.6*, respectively, on the wheat consensus map.

QTL for grain size parameters, i.e. TGW, grain area and width, were identified on the short arm of chromosome 1B in the SpXR population with the Spark allele decreasing the value of all three parameters (Supplemental Figure 3C). In the AxC population, small but stable effects for grain width, L/W and FFD were identified at the distal end of chromosome 1D with the Avalon allele reducing grain width and FFD, and increasing L/W (Supplemental Figure 3A). The same very distal location of these QTL suggests that these effects could be under the control of homoeoalleles.

#### Homoeologous group 2

Significant effects for TGW, grain area, width, and FFD were identified on the distal part of chromosome 2A in the MxC population (Supplemental Figure 3E). Specifically, all the QTL identified are around marker *gwm95* with LOD scores ranging between 3.5 and 6.3 and explaining between 22.3% and 34.9% of the trait variation. The Malacca allele increases the phenotypic value of the traits.

QTL for L/W were identified at an equivalent region of 2A in the MxC and SaxR populations (Supplemental Figure 3D and 3E). These effects explained 20.8% and 15.1% of the variation present in MxC and SaxR, respectively, with Malacca and Savannah decreasing the phenotypic value of the trait. Meta-analysis identified one meta-QTL in the interval *wmc819-gwm47*.

An effect for L/W was identified on chromosome 2D in the BxS population that was stable over two years. The QTL interval spanned around marker *wmc412* on the long arm of 2D, with an LOD ranging between 3.3 and 3.8 and explained ~22% of the phenotypic variation (Supplemental Figure 3B). In the same mapping interval, QTL for grain length and FFD were also identified, but only for one year.

QTL for grain width and TGW (Sun et al., 2009), and grain area (Breseghello, 2007) were previously identified on the short arm of chromosome 2A at an interval approximately equivalent to the QTL reported for MxC in this study. Effects for grain length were detected on the long arm of chromosome 2B in three other populations (Campbell et al., 1999; Dholakia et al., 2003; Sun et al., 2009) at similar position as the grain length QTL in MxC. Markers associated with grain length (Campbell et al., 1999) and FFD (Dholakia et al., 2003) have been previously identified on the long arm of 2D that co-locate with the QTL for these traits in the BxS population.

#### Homoeologous group 3

Significant QTL for grain size and shape parameters were identified on chromosome 3A in AxC, BxS, MxC and SaxR. In the AxC population, large effects for grain length and L/W were identified around marker *wmc264* that explained ~13% and 18% of the trait variation, respectively (Supplemental Figure 3A). The Avalon allele increases the phenotypic value for both traits. Small but stable effects were also detected for FFD in the same mapping interval. Strong QTL for grain size related parameters, i.e. TGW, grain width and FFD, were detected in the BxS population around marker *wPt-4692*, each of which explained 27.9%, 21.1% and 31.6% of the variation, correspondingly (Supplemental Figure 3B). QTL for grain width and L/W were identified in the

MxC population that explained ~19% of the phenotypic variation (Supplemental Figure 3E). An effect was also found in SaxR that explained 19.4% of the variation in grain length (Supplemental Figure 3D). Three meta-QTL were identified in the following mapping intervals: *wPt1688-barc45*, *wPt9562-wPt9215*, and *barc19-cfa2262*.

Small effects for grain length, area, TGW and FFD were detected on chromosome 3B in the AxC population. The grain length and area QTL were stable in both years and explained ~8% and ~10% of the trait variation, respectively (Supplemental Figure 3A). Significant QTL for TGW and FFD were identified only in one year but suggestive QTL (LOD 2.7 and 2.4, respectively) were present in the same interval in the second year.

#### Homoeologous group 4

Some of the largest QTL for grain size parameters were detected on chromosome 4B in the BxS and AxC populations. Specifically, in the BxS population, significant QTL for TGW, grain area, width and FFD identified around the marker *s14/m15.6* that explained between 25.1% and 50.2% of the variation (Supplemental Figure 3B). For all the QTL, Beaver contributed the decreasing allele. Interestingly, a strong effect was also detected in the same mapping interval (around marker *s14/m15.6*) for L/W (24.1-32.8% variation explained) with Beaver increasing the trait value. In the AxC population, the 4B effect on TGW, grain width, area and FFD was identified in both years around marker *wmc349* with the Avalon allele reducing the phenotypic value of the traits (Supplemental Figure 3A). Meta-analysis identified one meta-QTL, between *s14/m15.6* and *wmc349*. QTL for TGW and FFD were identified on chromosome 4D in SpXR around the *Rht-D1* locus with the Spark allele increasing the trait value (Supplemental Figure 3C). Effects at the same region for FFD, TGW, and grain width were identified in the AxC population that also segregates for *Rht-D1*.

#### Homoeologous group 5

Multiple QTL for both grain size and shape parameters were identified on chromosome 5A in the AxC, SxS, SpXR, and SaxR populations. In AxC, a strong effect for grain length and L/W was detected around the marker *gwm156* that

was stable in both years (Supplemental Figure 3A). Grain length QTL had a LOD ranging between 16.3 and 18.1 and explained ~35.4% of the variation, while the L/W QTL had an LOD between 6.8 and 7.9 and explained ~20% of the variation apparent in the population. Large QTL for grain area (LOD 11.7-12.2) and TGW (LOD 4.2-4.8) were identified spanning the same mapping interval, each of which explained ~25% and 10% of the phenotypic variation, correspondingly. The Avalon allele considerably decreases the value of the traits above. In the SpXR population, QTL for grain length, width, area and TGW were detected spanning the interval between markers *gwm443* and *wPt-4131* on chromosome 5A, with Spark contributing the increasing allele (Supplemental Figure 3C). QTL for the same traits were also found in the SaxR population with the Savannah allele increasing the phenotypic values of all the traits but grain length (Supplemental Figure 3D). Significant effects for TGW, FFD, grain width and L/W were identified in the same mapping interval in the SxS population (Supplemental Figure 3F). The L/W QTL was stable over the two years and explained ~30% of the variation with the Shamrock allele increasing the trait value. QTL for TGW, FFD, and grain width were detected in that interval only for one year, with Shamrock reducing the phenotypic value. This is consistent with the significant negative correlation between TGW, grain width and L/W apparent only for that specific year. Meta-analysis identified four meta-QTL that spanned the intervals *wmc443-cfa2104*, *wmc492-wmc475*, *wPt0654-wPt3069*, and *wmc110-wmc727*, respectively.

#### Homoeologous group 6

Two distinct clusters of QTL, i.e. one for grain size and the other for grain shape parameters, were identified on chromosome 6A in the AxC population. Effects for grain width, FFD and TGW (one year) were detected on the short arm of 6A, around marker *barc171*, with the Avalon allele conferring an increase in the trait values (Supplemental Figure 3A). A QTL for L/W was detected in both years on the long arm of 6A, around marker *wPt7204*, that explained ~12% of the trait variation with Avalon contributing the decreasing allele (Supplemental Figure 3A). Additionally, a QTL for grain length was identified only in one year spanning an interval equivalent to the L/W QTL and conferring the same negative effect on



the trait. Effects for TGW and grain area in MxC and TGW, grain width, and FFD in SaxR were detected in an equivalent interval of chromosome 6A (Supplemental Figure 3D and 3E). Meta-analysis identified two meta-QTL at the proximal (*wmc6807-psp3071*) and the distal end (*cos07Tb-wPt5480*) of the chromosome, respectively.

Homoeologous group 7

A large effect controlling grain length was identified on chromosome 7A in the SxS population that was stable over the two years of trials (Supplemental Figure 3F). The LOD score of the QTL ranged between 3.4 and 6.8 and explained ~30% of the variation in grain length. QTL for grain area and TGW were detected in the same interval but only for one year. In the SaxR population, two significant QTL were detected at an equivalent chromosomal region of 7A, each of which explained 15.8% and 21.7% of the variation in grain length and L/W. In both instances, the Savannah allele decreased the trait values. Minor effects, but stable over two years, for grain length and L/W, were detected on chromosome 7D in the AxC population with Avalon decreasing the trait value.

### Supplemental References

- Breseghello, F., Sorrells, M.E.** . (2007). QTL analysis of kernel size and shape in two hexaploid wheat mapping populations. *Field Crop Research* **101**, 172-179.
- Campbell, K.G., Bergman, C.J., Gualberto, D.G., Anderson, J.A., Giroux, M.J., Hareland, G., Fulcher, R.G., Sorrells, M.E., and Finney, P.L.** (1999). Quantitative Trait Loci Associated with Kernel Traits in a Soft x Hard Wheat Cross. *Crop Sci* **39**, 1184-1195.
- Dholakia, B.B., Ammiraju, J.S.S., Singh, H., Lagu, M.D., Röder, M.S., Rao, V.S., Dhaliwal, H.S., Ranjekar, P.K., Gupta, V.S., and Weber, W.E.** (2003). Molecular marker analysis of kernel size and shape in bread wheat. *Plant Breeding* **122**, 392-395.
- Sun, X.-Y., Wu, K., Zhao, Y., Kong, F.-M., Han, G.-Z., Jiang, H.-M., Huang, X.-J., Li, R.-J., Wang, H.-G., and Li, S.-S.** (2009). QTL analysis of kernel shape and weight using recombinant inbred lines in wheat. *Euphytica* **165**, 615-624.
